# Supplementary material for: New Theonellapeptolides from Indonesian Marine Sponge Theonella swinhoei as Anti-Austerity Agents
Source: MDPI journal article supplement (doi:10.3390/md20110661), 2022-10-25
Supplement: s1 [file s1]

## Supplementary Information

# New Theonellapeptolides from Indonesian Marine Sponge *Theonella swinhoei* as Anti-austerity Agents

Jabal Rahmat Haedar <sup>1</sup>, Agustinus Robert Uria <sup>1,2</sup>, Subehan Lallo <sup>3</sup>, Dya Fita Dibwe <sup>4,5,6\*</sup>, and Toshiyuki Wakimoto <sup>1,2\*</sup>

<sup>1</sup> Faculty of Pharmaceutical Sciences, Hokkaido University, Kita 12, Nishi 6, Sapporo 060-0812, Japan

<sup>2</sup> Global Station for Biosurfaces and Drug Discovery, Global Institution for Collaborative Research and Education (GI-CoRE), Hokkaido University, Kita 12, Nishi 6, Sapporo 060-0812, Japan

<sup>3</sup> Faculty of Pharmacy, Hasanuddin University, Jl. Perintis Kemerdekaan Km. 10, Makassar 90245, Indonesia

<sup>4</sup> Faculty of Health Sciences, Hokkaido University, Kita-12, Nishi-5, Kita-Ku, Sapporo 060-0812, Japan

<sup>5</sup> Faculty of Sciences, Department of Chemistry, University of Kinshasa, Kinshasa P.O. Box 190 KIN XI, Congo

<sup>6</sup> Department of Biotechnology and Natural Products, Research Center for Applied Sciences and Technologies, 106 Boulevard 30 Juin, Kinshasa P.O. Box 8401 Kinshasa-1, Congo

\* Correspondence: [dibwedf@hs.hokudai.ac.jp](mailto:dibwedf@hs.hokudai.ac.jp) or [eddy.dibwe@unikin.ac.cd](mailto:eddy.dibwe@unikin.ac.cd) (D.F.D.); [wakimoto@pharm.hokudai.ac.jp](mailto:wakimoto@pharm.hokudai.ac.jp) (T.W.)

## Table of content

|                   |                                                                                                                |    |
|-------------------|----------------------------------------------------------------------------------------------------------------|----|
| <b>Figure S1</b>  | The work scheme of isolation and purification of <b>1–5</b> .....                                              | 4  |
| <b>Figure S2</b>  | COSY spectrum of <b>1</b> showing the presence of conformers .....                                             | 5  |
| <b>Figure S3</b>  | Tandem mass analyses of <i>seco</i> -acid methyl ester peptide ( <b>1a</b> , <b>2a</b> , and <b>4a</b> ) ..... | 6  |
| <b>Figure S4</b>  | MS/MS spectrum of <i>seco</i> -acid methyl ester peptide of <b>1a</b> .....                                    | 7  |
| <b>Figure S5</b>  | MS/MS/MS spectrum of fragment ion y <sub>8</sub> of <b>1a</b> .....                                            | 8  |
| <b>Figure S6</b>  | MS/MS/MS spectrum of fragment ion b <sub>5</sub> of <b>1a</b> .....                                            | 9  |
| <b>Figure S7</b>  | MS/MS/MS spectrum of fragment ion b <sub>2</sub> of <b>1a</b> .....                                            | 10 |
| <b>Figure S8</b>  | MS/MS spectrum of <i>seco</i> -acid methyl ester peptide of <b>2a</b> .....                                    | 11 |
| <b>Figure S9</b>  | MS/MS/MS spectrum of fragment ion y <sub>8</sub> of <b>2a</b> .....                                            | 12 |
| <b>Figure S10</b> | MS/MS/MS spectrum of fragment ion b <sub>5</sub> of <b>2a</b> .....                                            | 13 |
| <b>Figure S11</b> | MS/MS spectrum of <i>seco</i> -acid methyl ester peptide of <b>3a</b> .....                                    | 14 |
| <b>Figure S12</b> | MS/MS/MS spectrum of fragment ion y <sub>10</sub> of <b>3a</b> .....                                           | 15 |
| <b>Figure S13</b> | MS/MS/MS spectrum of fragment ion b <sub>3</sub> of <b>3a</b> .....                                            | 16 |
| <b>Figure S14</b> | MS/MS spectrum of <i>seco</i> -acid methyl ester peptide of <b>4a</b> .....                                    | 17 |
| <b>Figure S15</b> | MS/MS/MS spectrum of fragment ion y <sub>8</sub> of <b>4a</b> .....                                            | 18 |
| <b>Figure S16</b> | MS/MS/MS spectrum of fragment ion b <sub>5</sub> of <b>4a</b> .....                                            | 19 |
| <b>Figure S17</b> | MS/MS spectrum of <i>seco</i> -acid methyl ester peptide of <b>5a</b> .....                                    | 20 |
| <b>Figure S18</b> | MS/MS/MS spectrum of fragment ion y <sub>10</sub> of <b>5a</b> .....                                           | 21 |
| <b>Figure S19</b> | MS/MS/MS spectrum of fragment ion b <sub>3</sub> of <b>5a</b> .....                                            | 22 |
| <b>Figure S20</b> | <sup>1</sup> H NMR spectrum (CDCl <sub>3</sub> , 500 MHz) of compound <b>1</b> .....                           | 23 |
| <b>Figure S21</b> | <sup>13</sup> C NMR spectrum (CDCl <sub>3</sub> , 125 MHz) of compound <b>1</b> .....                          | 23 |
| <b>Figure S22</b> | COSY NMR spectrum (CDCl <sub>3</sub> , 500 MHz) of compound <b>1</b> .....                                     | 24 |
| <b>Figure S23</b> | HSQC NMR spectrum (CDCl <sub>3</sub> , 500 MHz) of compound <b>1</b> .....                                     | 24 |
| <b>Figure S24</b> | HMBC NMR spectrum (CDCl <sub>3</sub> , 500 MHz) of compound <b>1</b> .....                                     | 25 |
| <b>Figure S25</b> | ROESY NMR spectrum (CDCl <sub>3</sub> , 500 MHz) of compound <b>1</b> .....                                    | 25 |
| <b>Figure S26</b> | <sup>1</sup> H NMR spectrum (CDCl <sub>3</sub> , 500 MHz) of compound <b>2</b> .....                           | 26 |
| <b>Figure S27</b> | <sup>13</sup> C NMR spectrum (CDCl <sub>3</sub> , 125 MHz) of compound <b>2</b> .....                          | 26 |
| <b>Figure S28</b> | COSY NMR spectrum (CDCl <sub>3</sub> , 500 MHz) of compound <b>2</b> .....                                     | 27 |
| <b>Figure S29</b> | HSQC NMR spectrum (CDCl <sub>3</sub> , 500 MHz) of compound <b>2</b> .....                                     | 27 |
| <b>Figure S30</b> | HMBC NMR spectrum (CDCl <sub>3</sub> , 500 MHz) of compound <b>2</b> .....                                     | 28 |
| <b>Figure S31</b> | ROESY NMR spectrum (CDCl <sub>3</sub> , 500 MHz) of compound <b>2</b> .....                                    | 28 |
| <b>Figure S32</b> | <sup>1</sup> H NMR spectrum (CDCl <sub>3</sub> , 500 MHz) of compound <b>3</b> .....                           | 29 |
| <b>Figure S33</b> | <sup>13</sup> C NMR spectrum (CDCl <sub>3</sub> , 125 MHz) of compound <b>3</b> .....                          | 29 |
| <b>Figure S34</b> | COSY NMR spectrum (CDCl <sub>3</sub> , 500 MHz) of compound <b>3</b> .....                                     | 30 |
| <b>Figure S35</b> | HSQC NMR spectrum (CDCl <sub>3</sub> , 500 MHz) of compound <b>3</b> .....                                     | 30 |
| <b>Figure S36</b> | HMBC NMR spectrum (CDCl <sub>3</sub> , 500 MHz) of compound <b>3</b> .....                                     | 31 |
| <b>Figure S37</b> | ROESY NMR spectrum (CDCl <sub>3</sub> , 500 MHz) of compound <b>3</b> .....                                    | 31 |
| <b>Figure S38</b> | MS/MS analysis of <b>1b</b> and its Marfey's analysis .....                                                    | 32 |
| <b>Figure S39</b> | Marfey's analysis of <b>1</b> .....                                                                            | 33 |
| <b>Figure S40</b> | MS/MS analysis of <b>2b</b> and its Marfey's analysis .....                                                    | 34 |
| <b>Figure S41</b> | Marfey's analysis of <b>2</b> .....                                                                            | 35 |
| <b>Figure S42</b> | MS/MS analysis of <b>3b</b> and its Marfey's analysis .....                                                    | 36 |
| <b>Figure S43</b> | Marfey's analysis of <b>3</b> .....                                                                            | 37 |
| <b>Table S1</b>   | List of obtained fragment ions from MS/MS analysis of <b>1a</b> .....                                          | 38 |
| <b>Table S2</b>   | List of obtained fragment ions from MS/MS/MS analysis of y <sub>8</sub> - <b>1a</b> .....                      | 39 |
| <b>Table S3</b>   | List of obtained fragment ions from MS/MS analysis of <b>2a</b> .....                                          | 40 |
| <b>Table S4</b>   | List of obtained fragment ions from MS/MS/MS analysis of y <sub>8</sub> - <b>2a</b> .....                      | 41 |
| <b>Table S5</b>   | List of obtained fragment ions from MS/MS analysis of <b>3a</b> .....                                          | 42 |
| <b>Table S6</b>   | List of obtained fragment ions from MS/MS/MS analysis of y <sub>10</sub> - <b>3a</b> .....                     | 43 |

|                  |                                                                                     |    |
|------------------|-------------------------------------------------------------------------------------|----|
| <b>Table S7</b>  | List of obtained fragment ions from MS/MS analysis of <b>4a</b> .....               | 44 |
| <b>Table S8</b>  | List of obtained fragment ions from MS/MS/MS analysis of $y_8$ - <b>4a</b> .....    | 45 |
| <b>Table S9</b>  | List of obtained fragment ions from MS/MS analysis of <b>5a</b> .....               | 46 |
| <b>Table S10</b> | List of obtained fragment ions from MS/MS/MS analysis of $y_{10}$ - <b>5a</b> ..... | 47 |
| <b>Table S11</b> | Biological activity of <b>1–6</b> .....                                             | 48 |

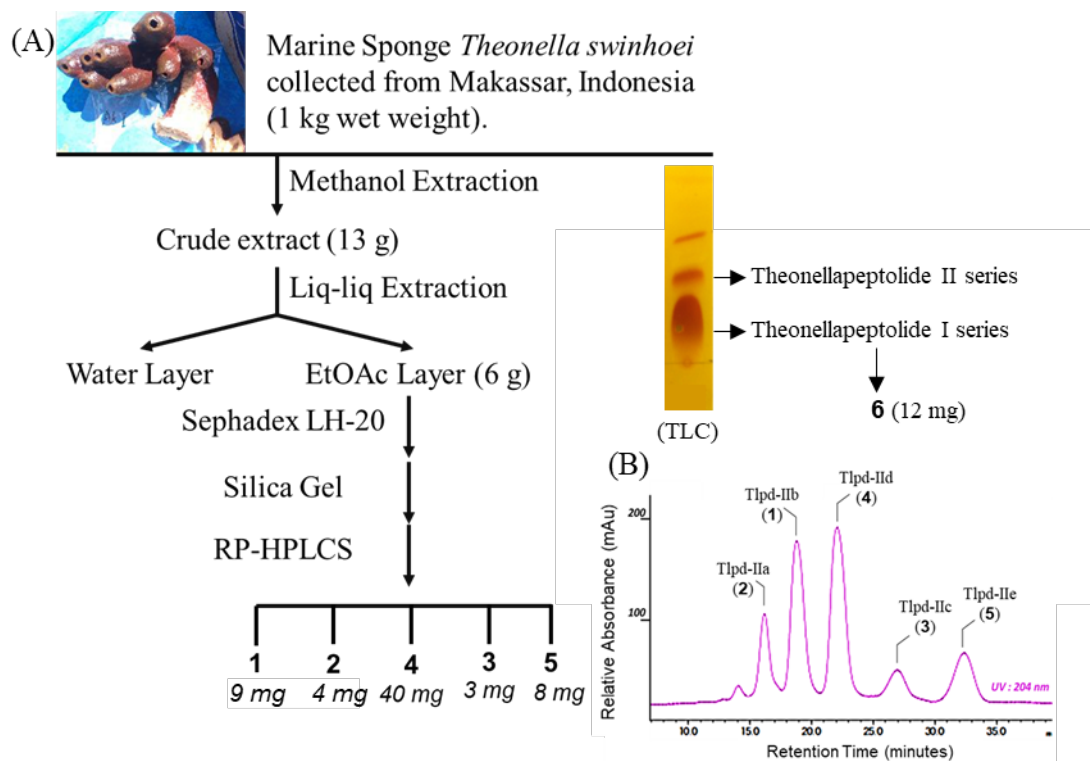

**Figure S1.** Isolation and purification of five theonellapeptolide-type compounds (**1**, **2**, **3**, **4**, and **5**) from Koningarengan *Theonella swinhoei*. Thin Layer Chromatography (TLC) analysis of the sponge methanol extract using dragendorff's reagent showed three brown spots. Secondary metabolites corresponding to the second spot were purified, resulting in the isolation of five different compounds (A); HPLC profile of five purified compounds **1**–**5** (B), in which two of them (**4** and **5**) are known theonellapeptolide IId and IIe, respectively. Three new analogues IIb (**1**), IIa (**2**), and IIc (**3**) were subsequently characterized to determine their chemical structures.

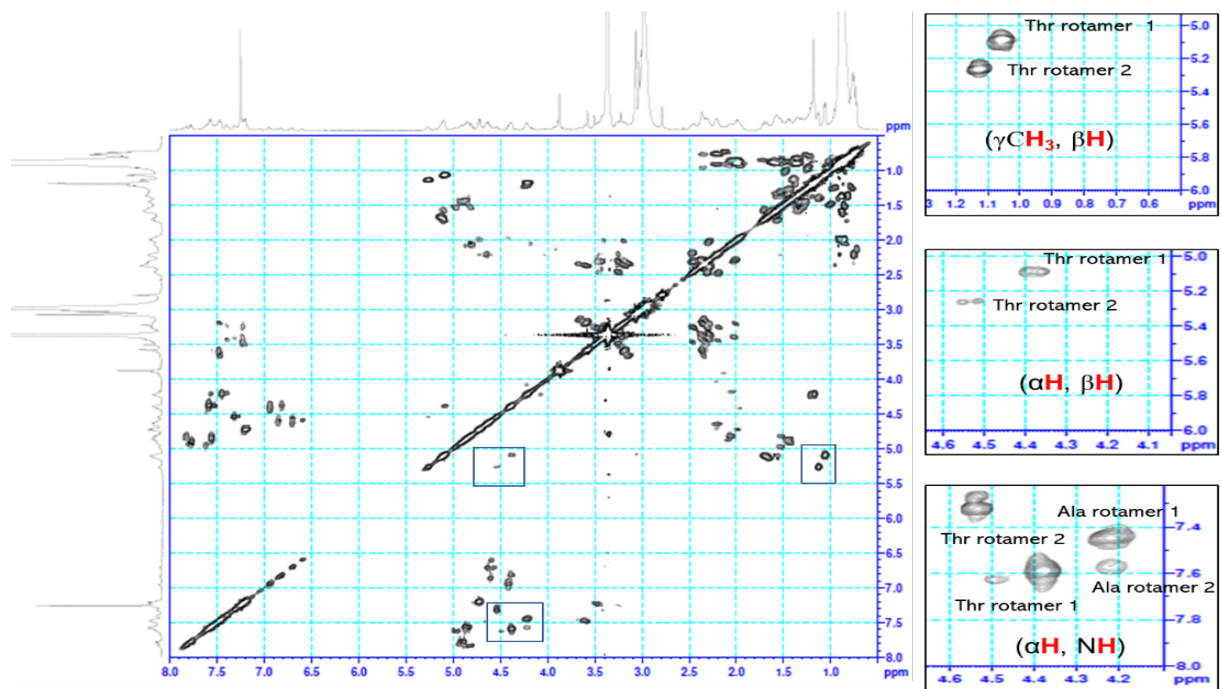

**Figure S2.**  $^1\text{H}$ - $^1\text{H}$  COSY of 2D NMR spectra (500 MHz) of compound **1** in  $\text{CDCl}_3$  showing threonine and alanine conformers.

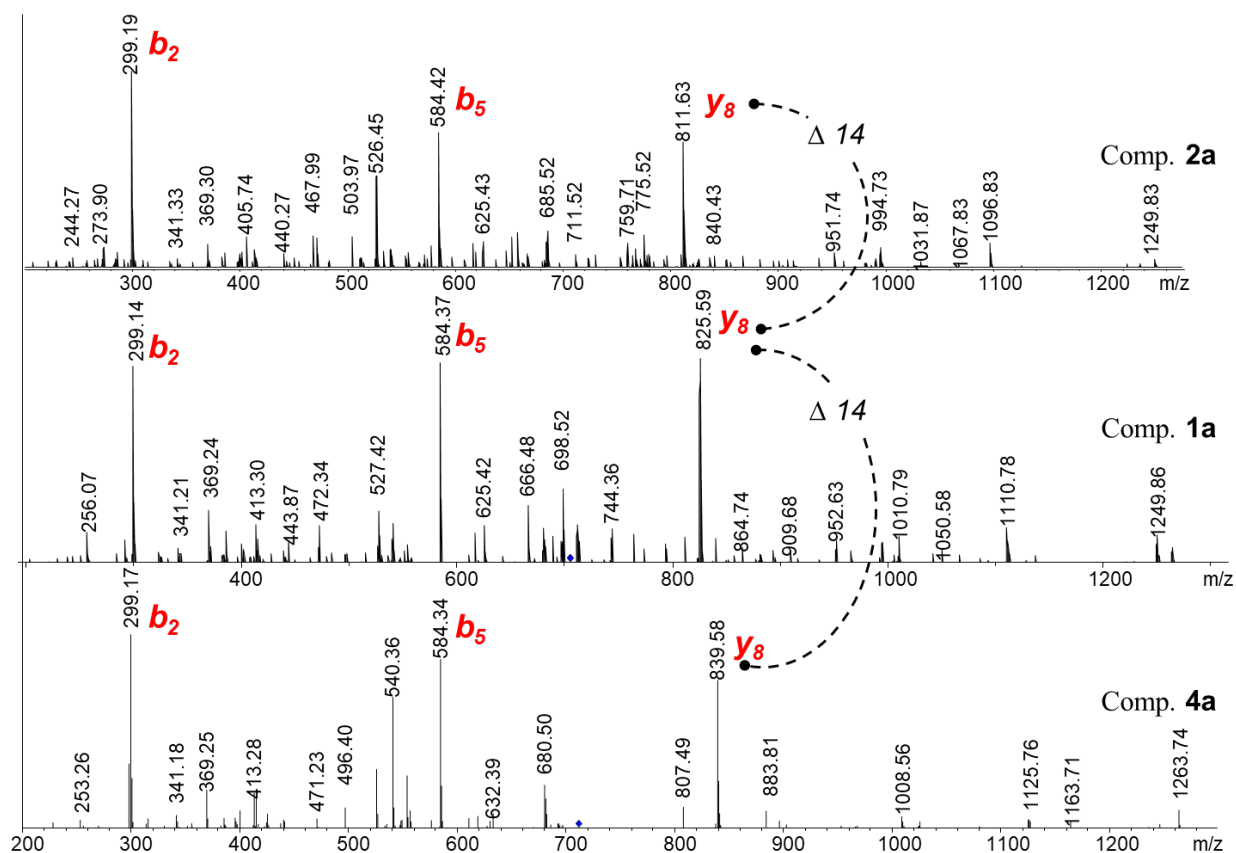

**Figure S3.** Tandem MS spectra of the *seco*-acid methyl ester peptides **1a** and **2a** compared with originally from known theonellapectolide IId (**4a**).

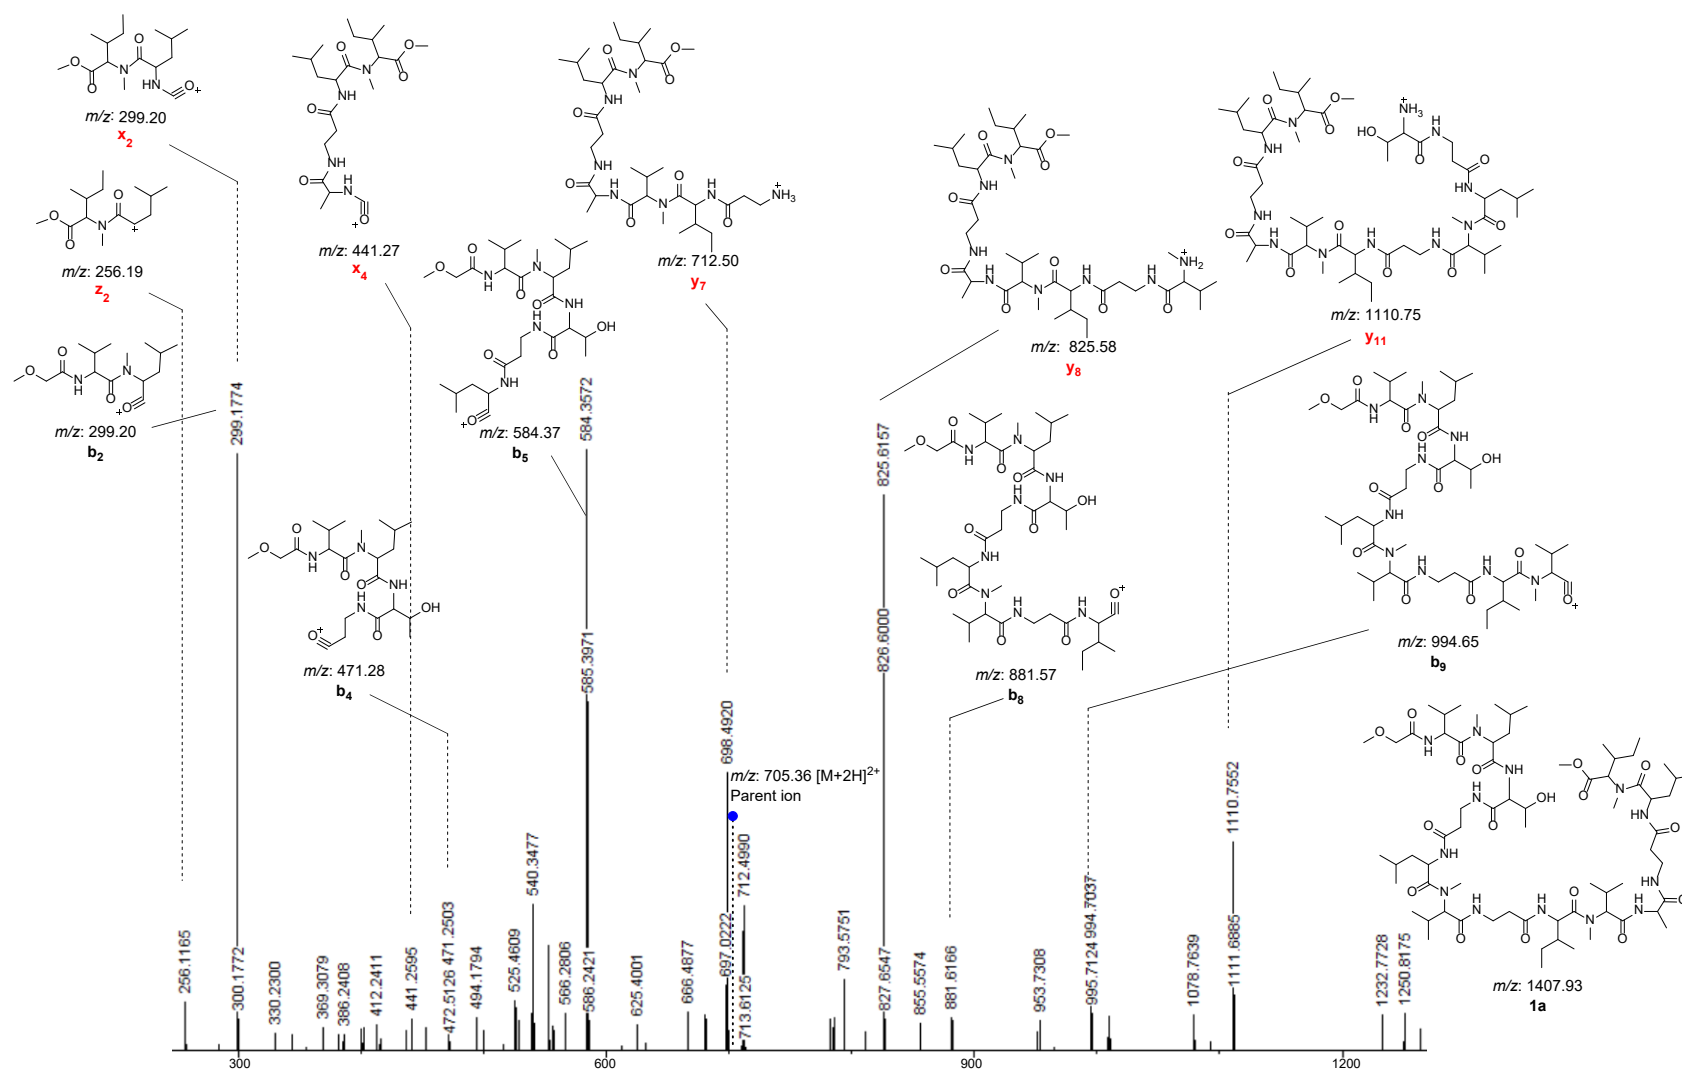

**Figure S4.** MS/MS spectrum of *seco*-acid methyl ester peptide **1a**  $m/z$  705.36  $[M+2H]^{2+}$ , (red colored letter denoted fragment ions generated toward C-terminus, black colored letter denoted fragment ions toward N-terminus). The other detected fragment ions are listed in Table S1.

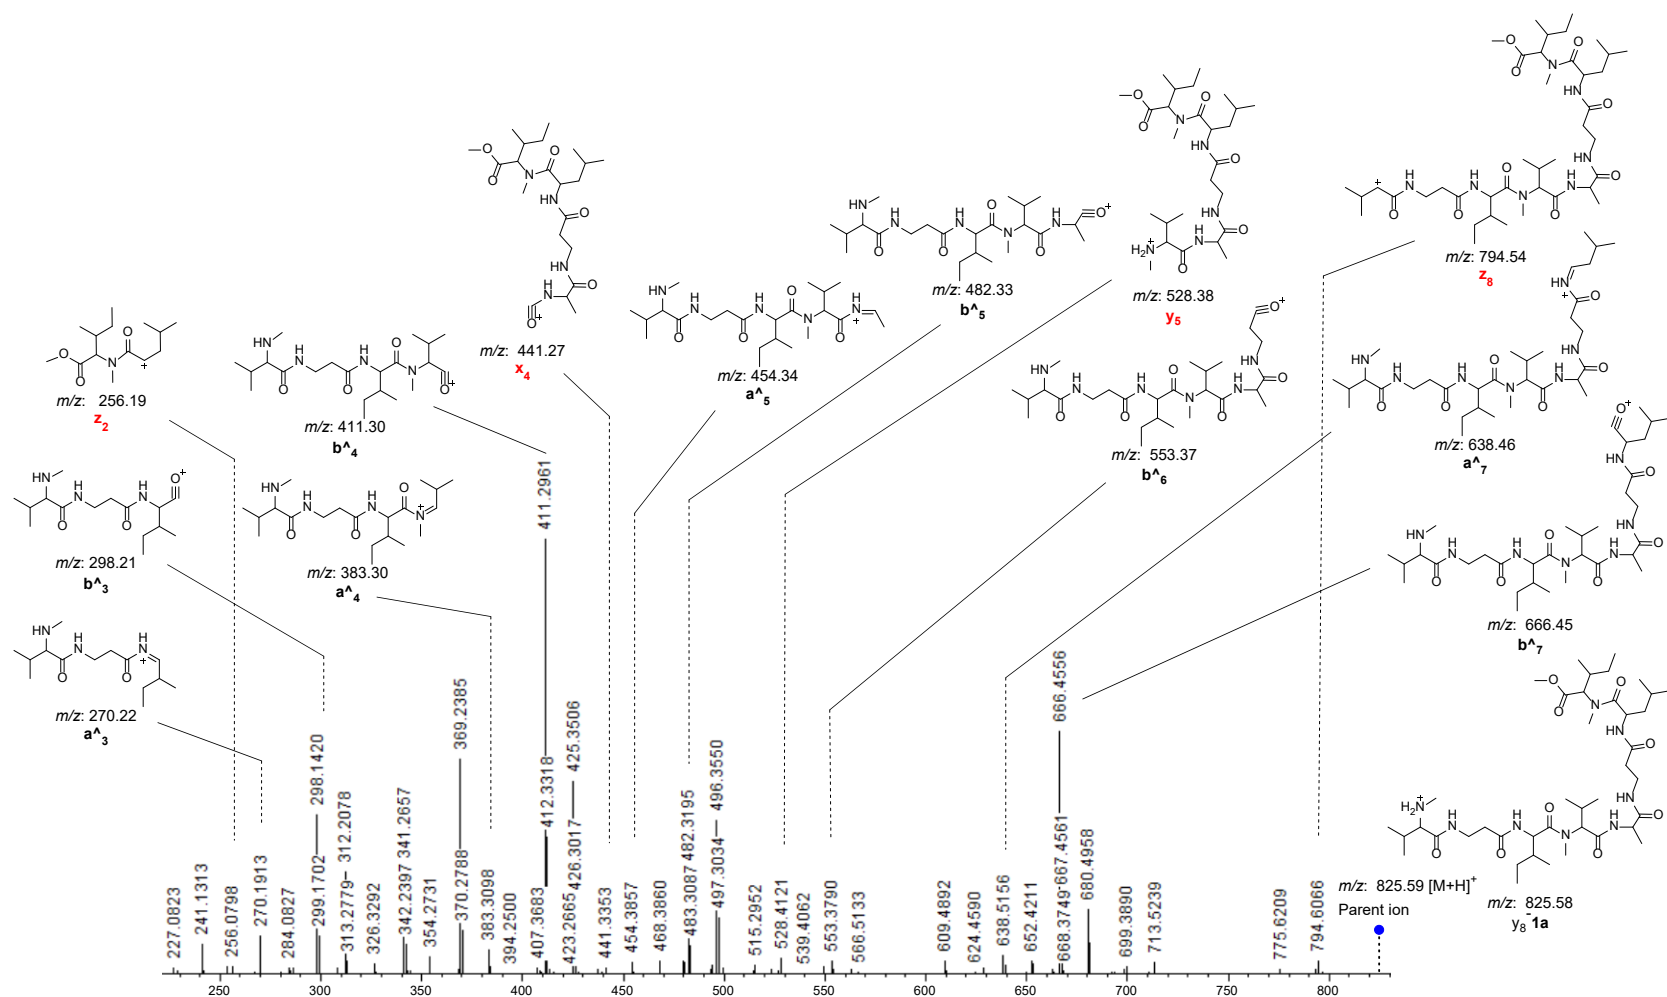

**Figure S5.** MS/MS/MS spectrum of fragment ion  $y_8$  of **1a**,  $m/z$  825.59  $[M+H]^+$  (red colored letter denoted fragment ions generated toward C-terminus, black colored letter denoted fragment ions toward N-terminus). The other detected fragment ions are listed in Table S2.



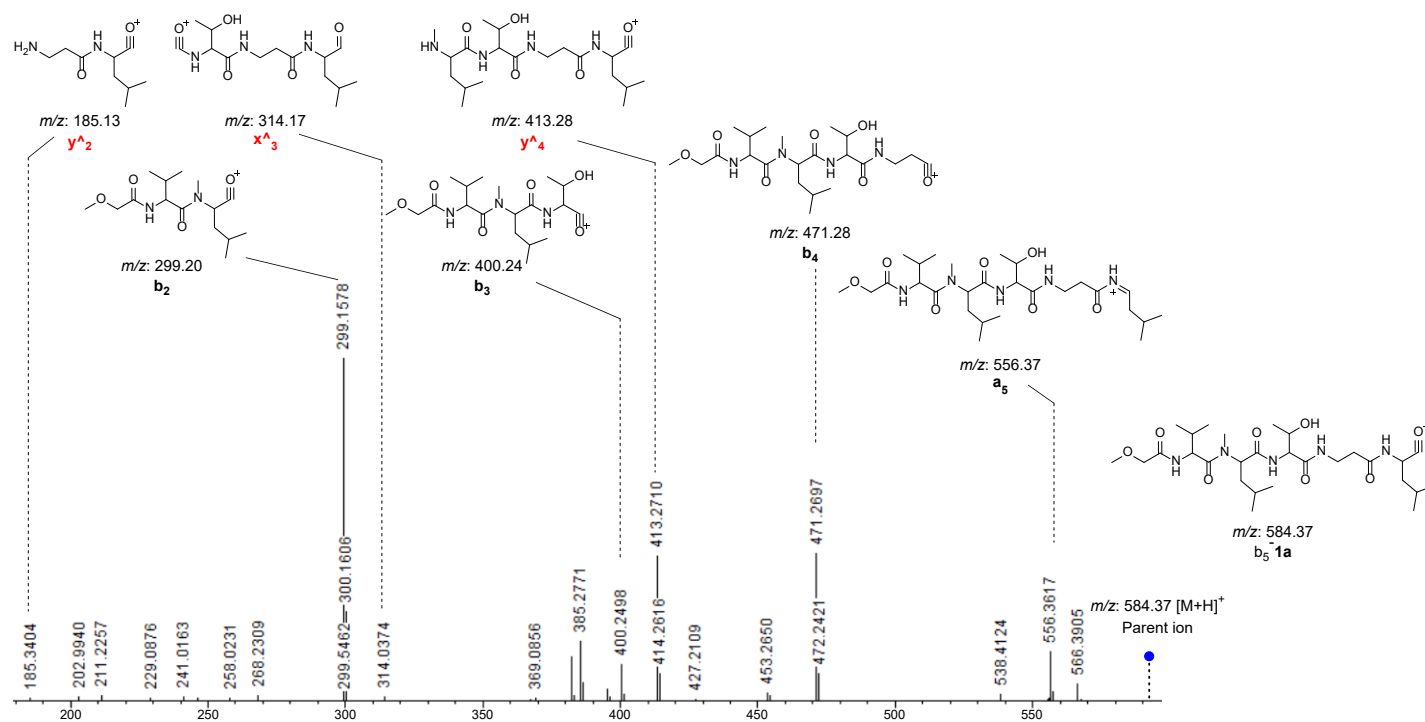

**Figure S6.** MS/MS/MS spectrum of fragment ion  $b_5$  of **1a**,  $m/z$  584.37 [M+H]<sup>+</sup> (red colored letter denoted fragment ions generated toward C-terminus; black colored letter denoted fragment ions toward N-terminus).

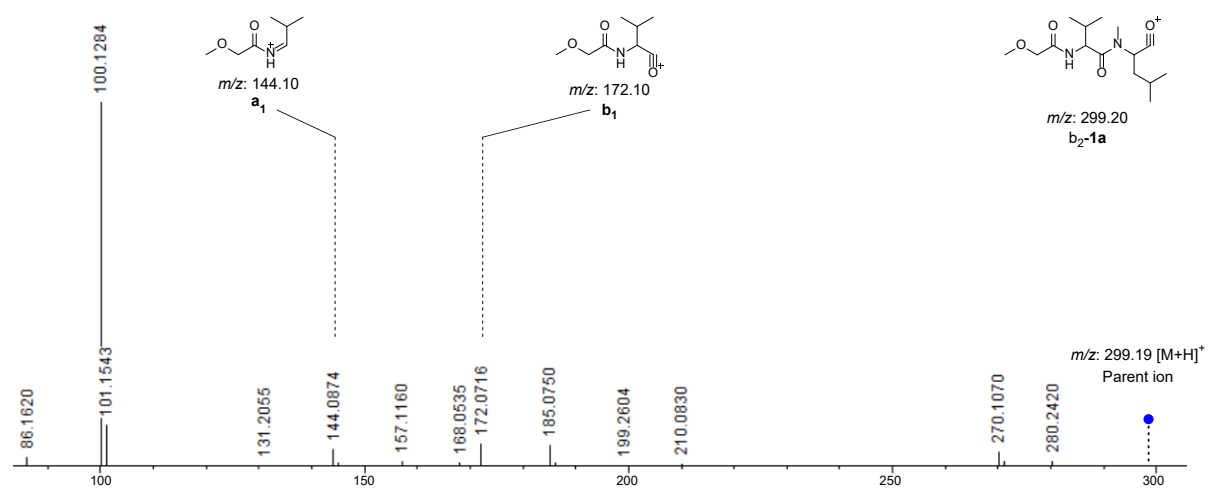

**Figure S7.** MS/MS/MS spectrum of fragment ion  $b_2$  of **1a**,  $m/z$  299.19  $[M+H]^+$  (fragment ions toward N-terminus).

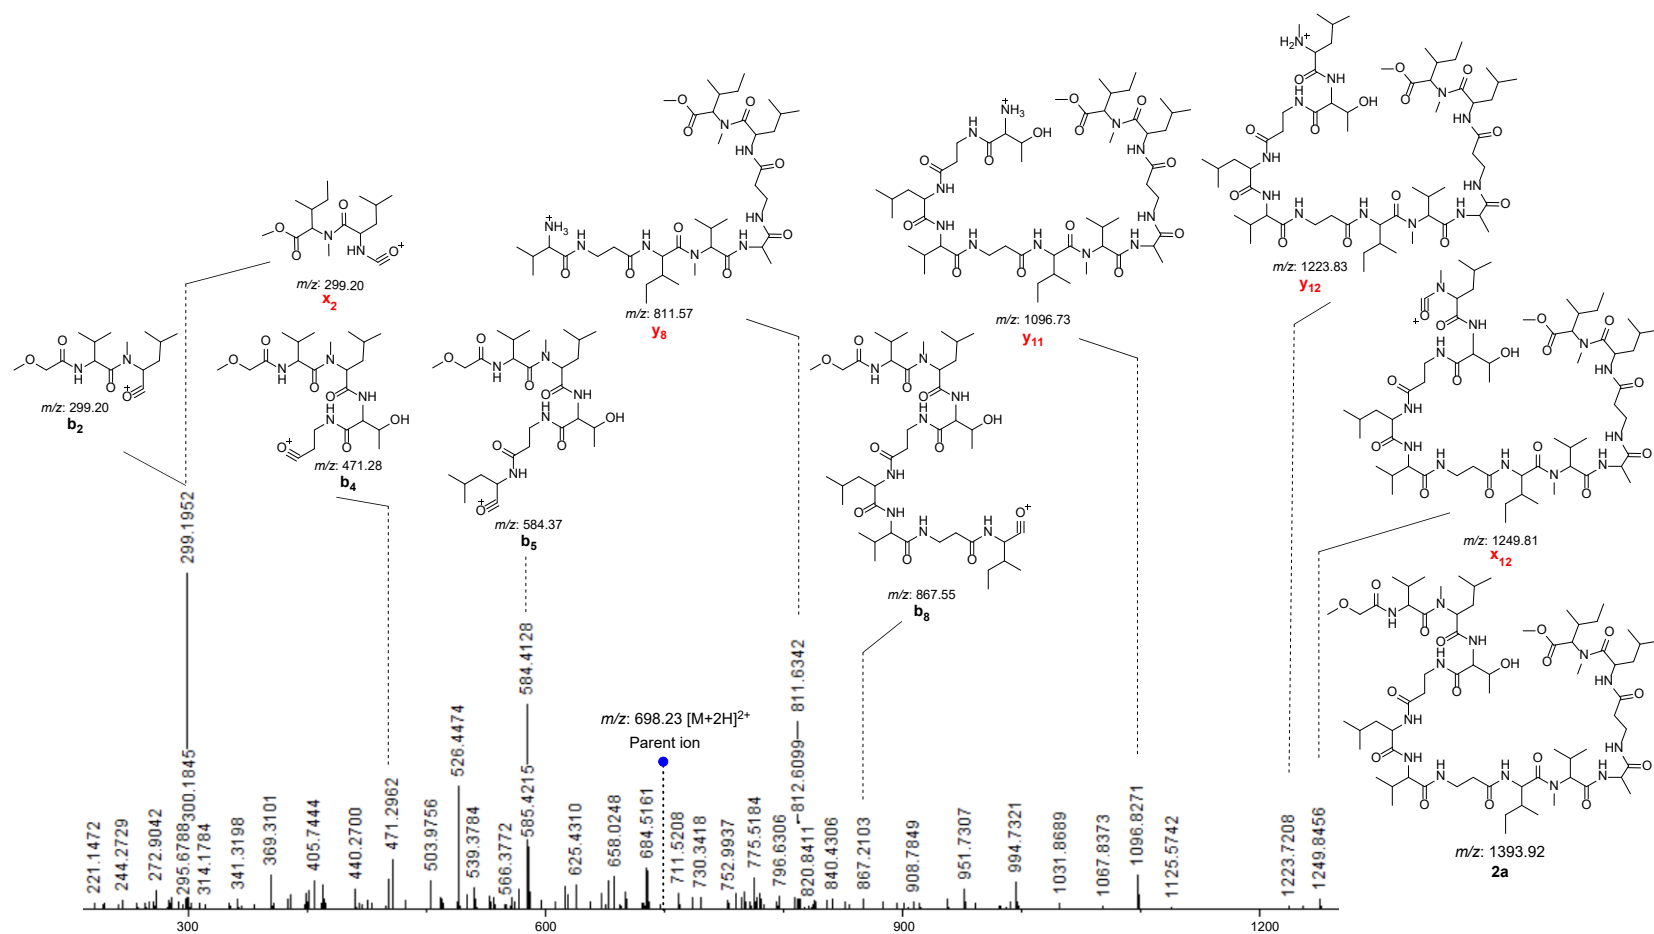

**Figure S8.** MS/MS spectrum of *seco*-acid methyl ester peptide **2a**,  $m/z$  698.23  $[M+2H]^{2+}$ , (red colored letter denoted fragment ions generated toward C-terminus, black colored letter denoted fragment ions toward N-terminus). The other detected fragment ions are listed in Table S3.

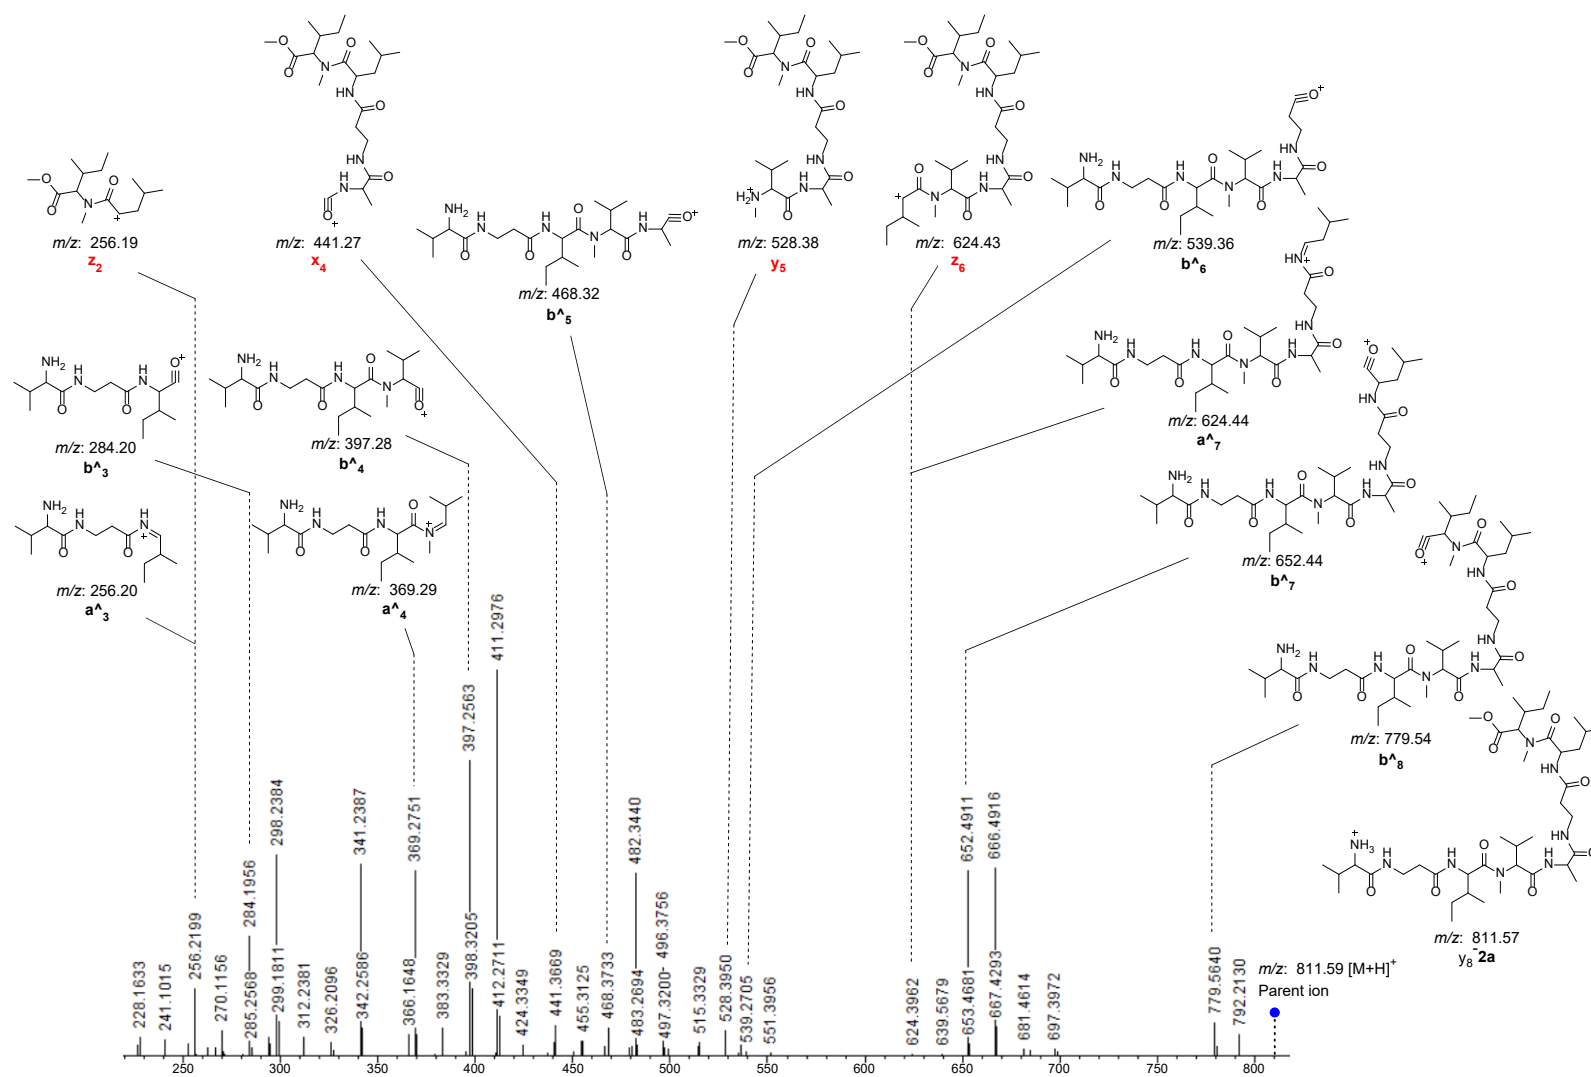

**Figure S9.** MS/MS/MS spectrum of fragment ion  $y_8$  of **2a**,  $m/z$  811.59 [M+H]<sup>+</sup>, (red colored letter denoted fragment ions generated toward C-terminus, black colored letter denoted fragment ions toward N-terminus). The other obtained fragment ions are listed in Table S4.

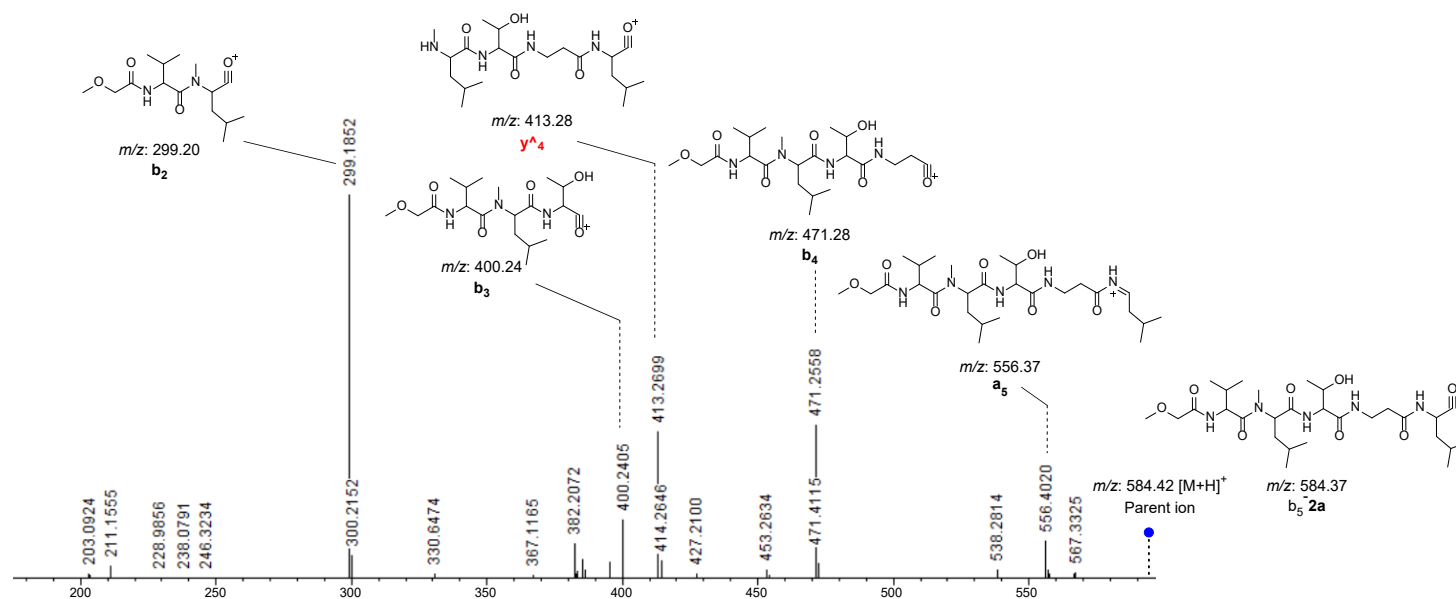

**Figure S10.** MS/MS/MS spectrum of fragment ion  $b_5$  of **2a**,  $m/z$  584.42  $[M+H]^+$ , (red colored letter denoted fragment ions generated toward C-terminus, black colored letter denoted fragment ions toward N-terminus).

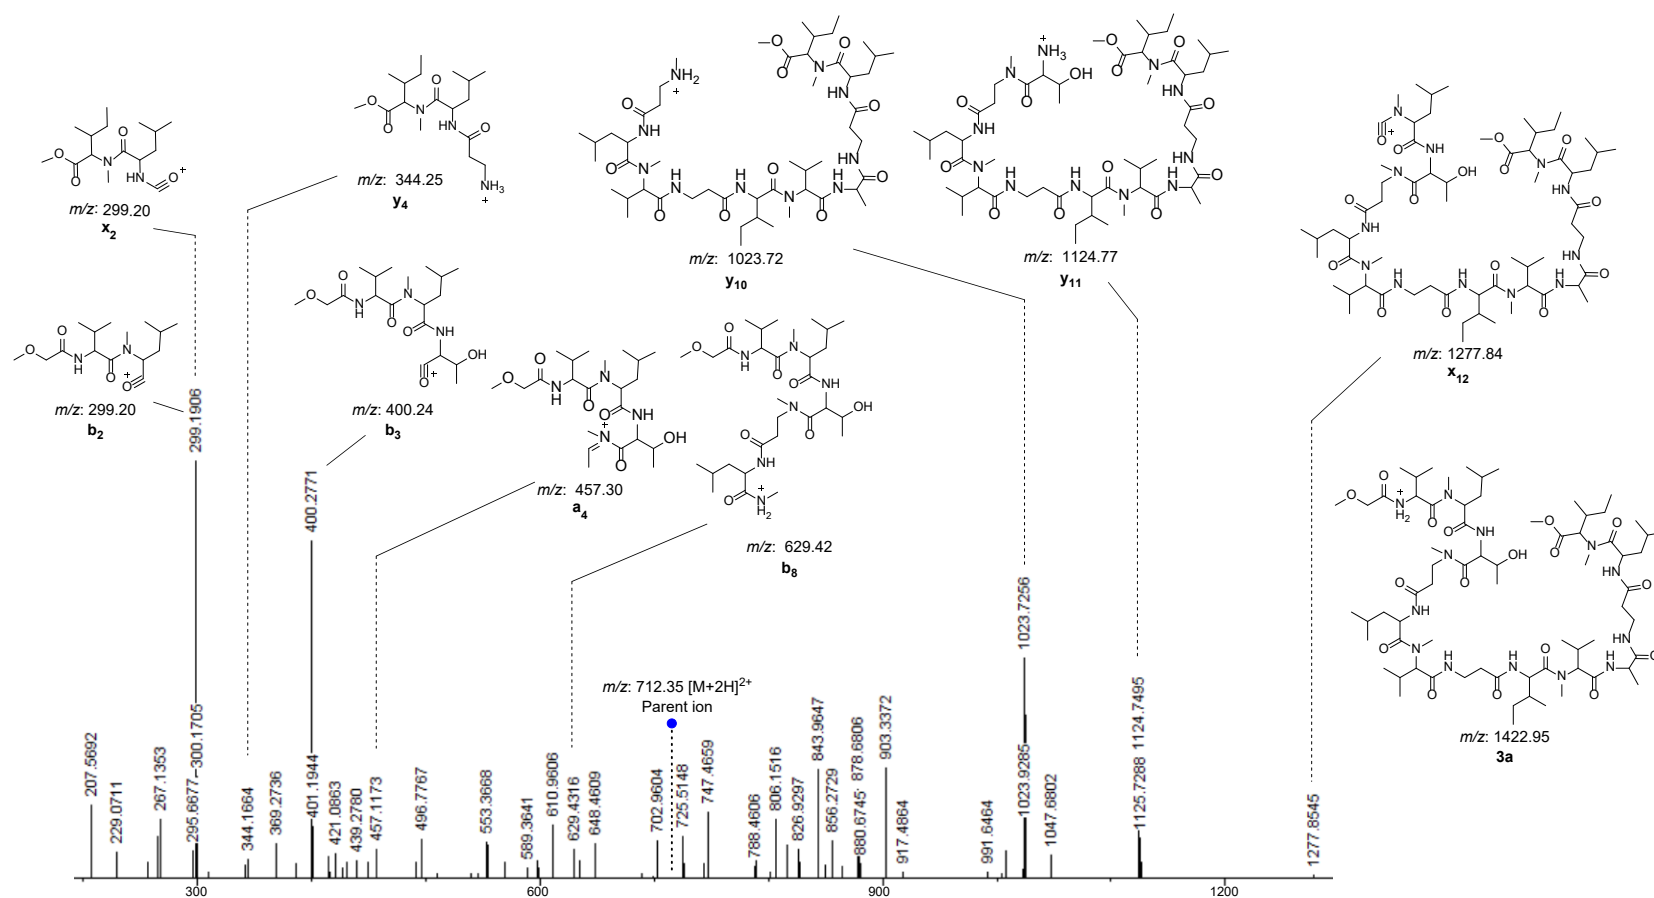

**Figure S11.** MS/MS spectrum of *seco*-acid methyl ester peptide **3a**,  $m/z$  712.35  $[M+2H]^{2+}$ , (red colored letter denoted fragment ions generated toward C-terminus, black colored letter denoted fragment ions toward N-terminus). The other detected fragment ions are listed in Table S5.

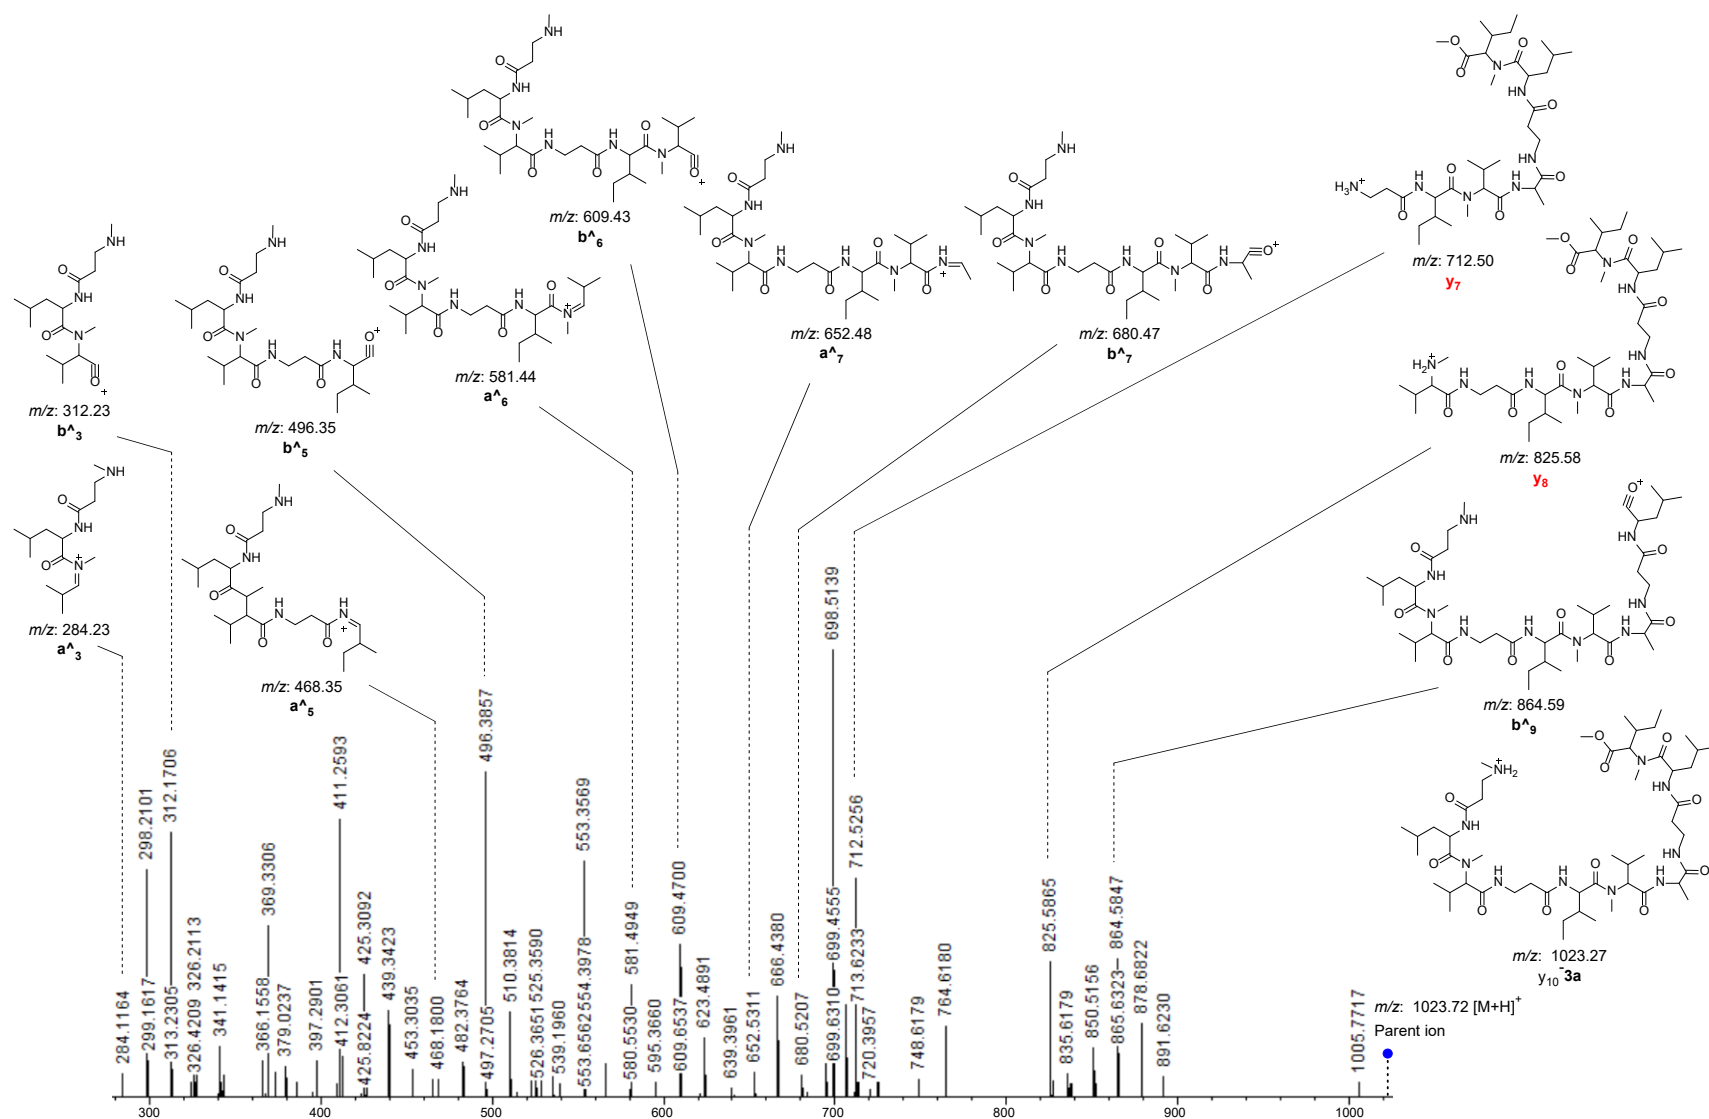

**Figure S12.** MS/MS/MS spectrum of fragment ion  $y_{10}$  of **3a**,  $m/z$  1023.27 [M+H]<sup>+</sup>, (red colored letter denoted fragment ions generated toward C-terminus, black colored letter denoted fragment ions toward N-terminus). The other detected fragment ions are listed in Table S6.

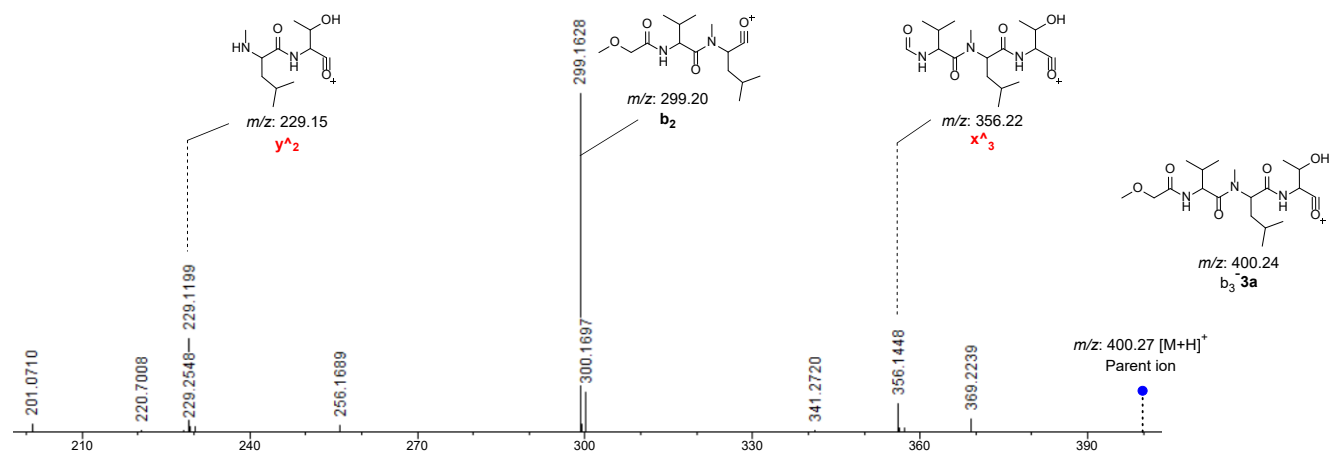

**Figure S13.** MS/MS/MS spectrum of fragment ion  $b_3$  of **3a**,  $m/z$  400.42  $[M+H]^+$ , (red colored letter denoted fragment ions generated toward C-terminus, black colored letter denoted fragment ions toward N-terminus).



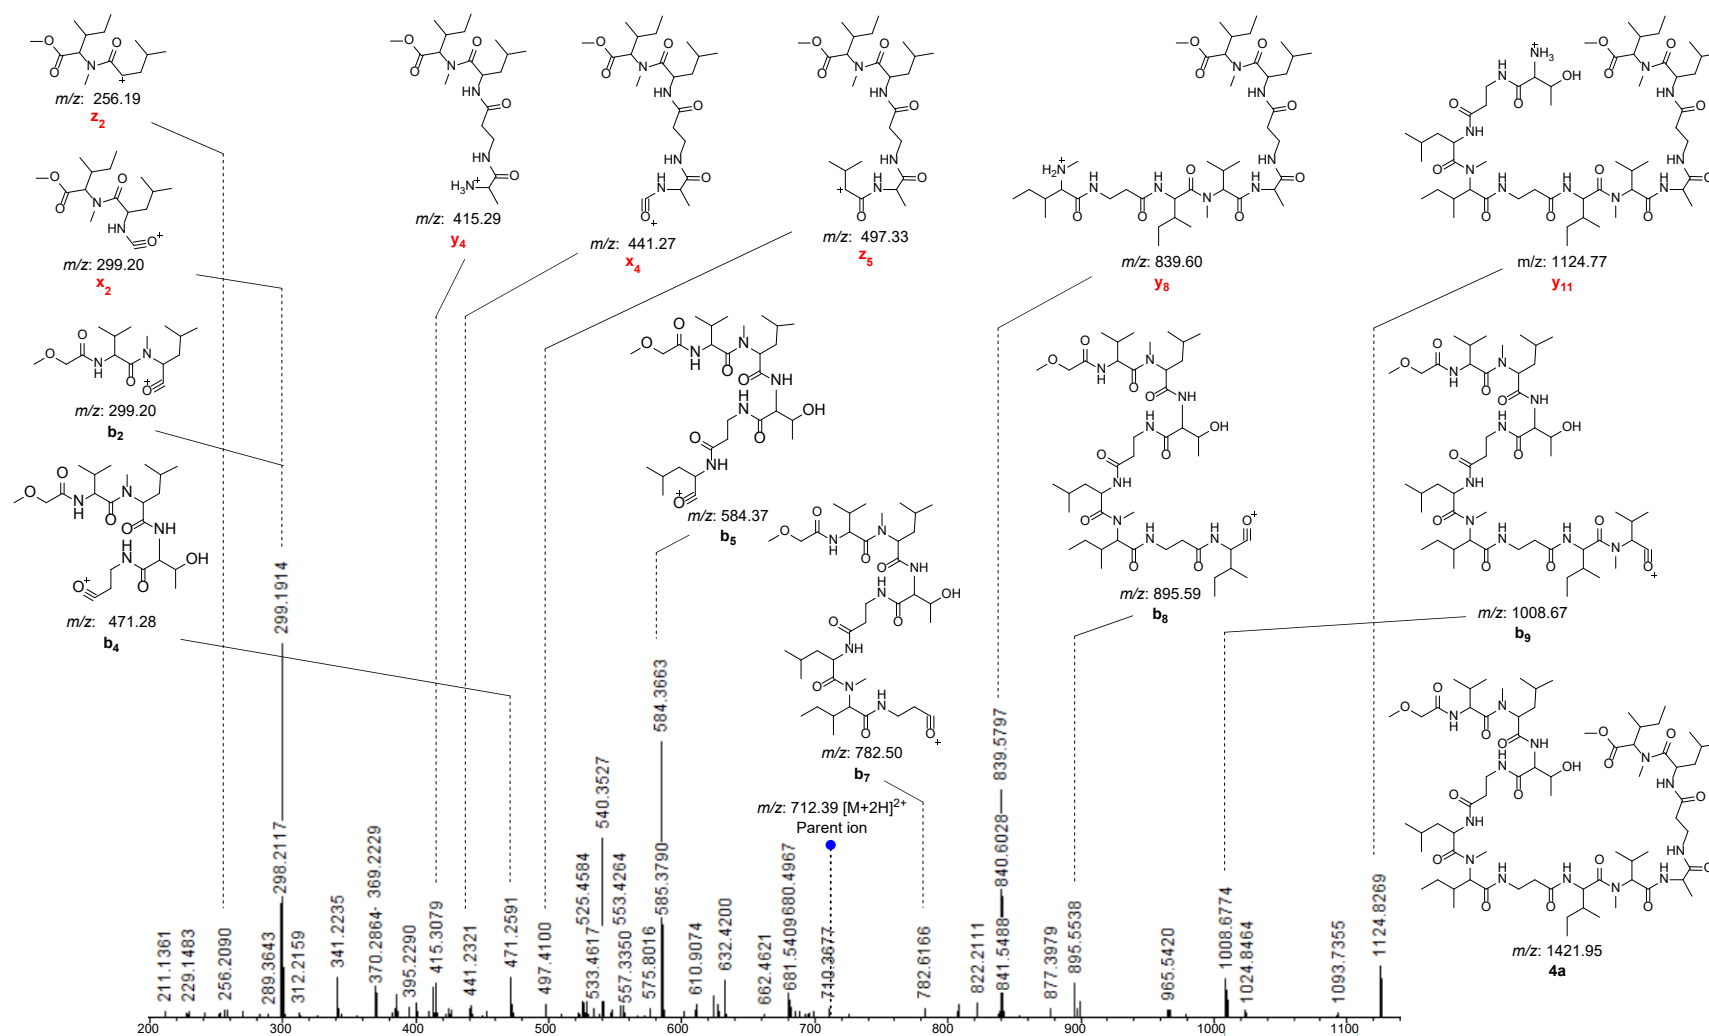

**Figure S14.** MS/MS spectrum of *seco*-acid methyl ester peptide **4a**,  $m/z$  712.39  $[M+2H]^{2+}$ , (red colored letter denoted fragment ions generated toward C-terminus, black colored letter denoted fragment ions toward N-terminus). The other detected fragment ions are listed in Table S7.

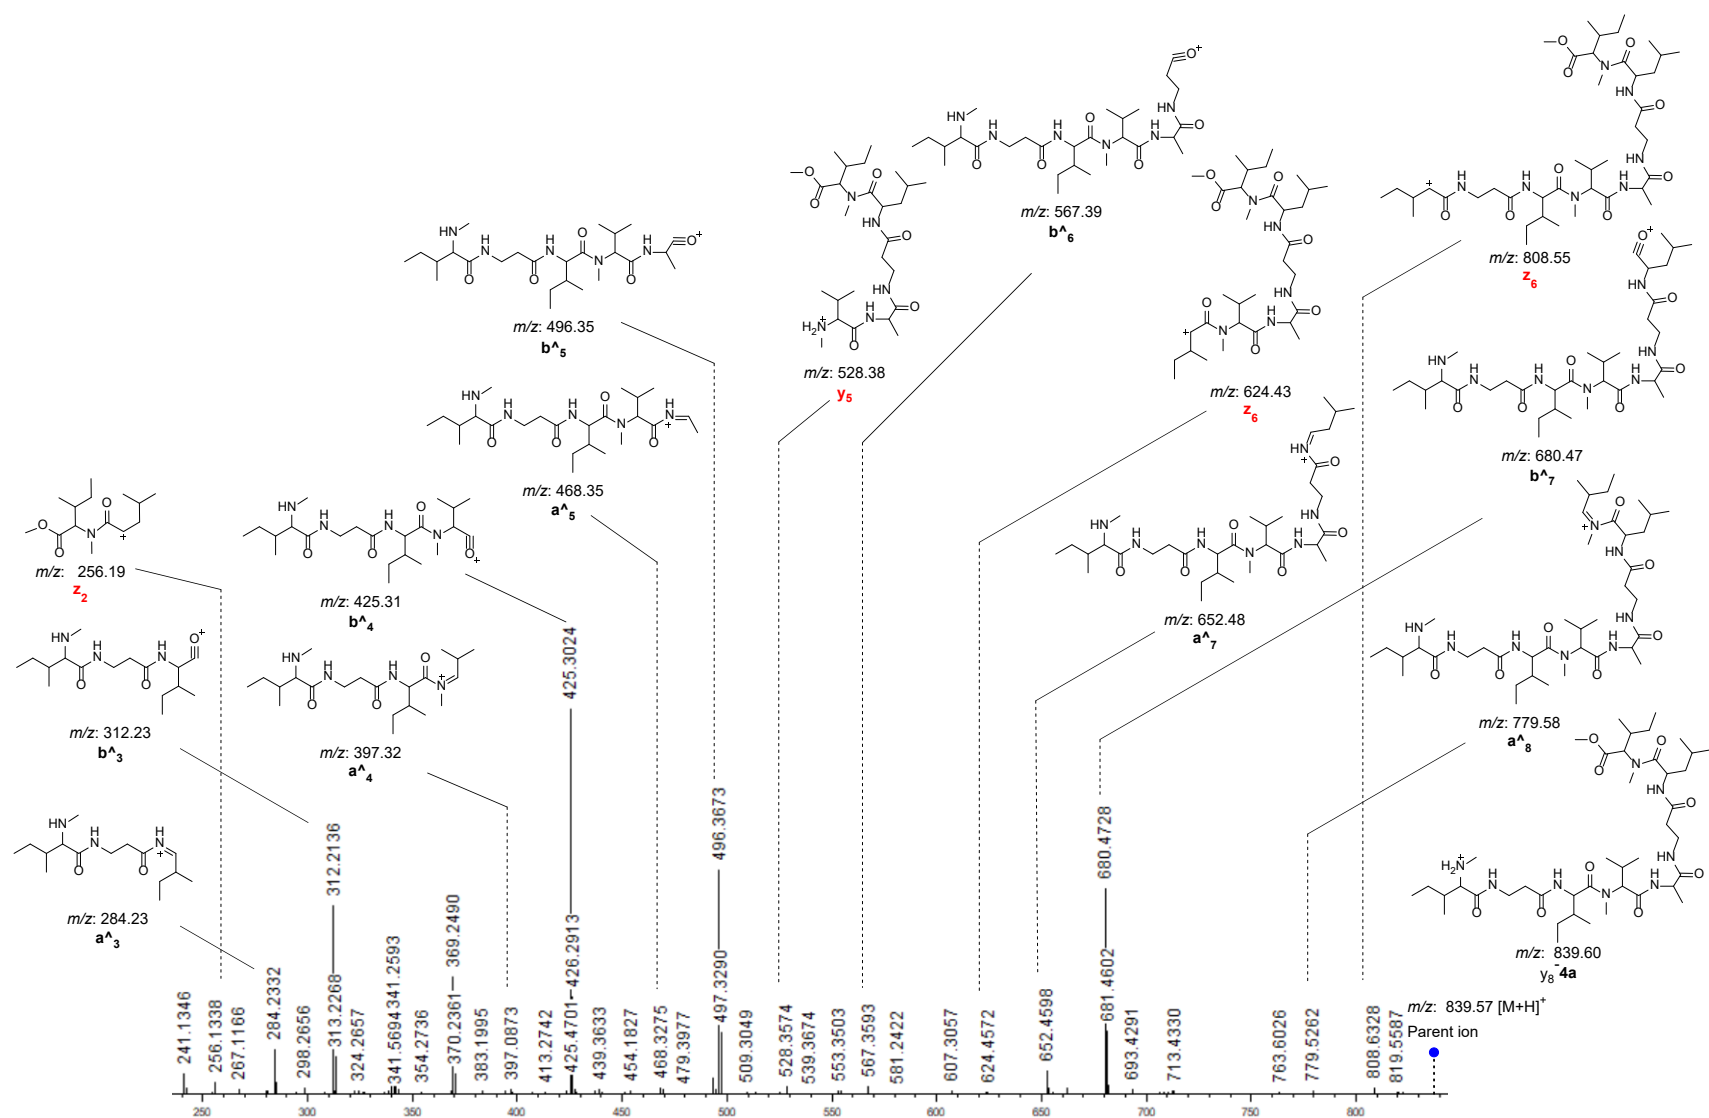

**Figure S15.** MS/MS/MS spectrum of fragment ion  $y_8$  of **4a**,  $m/z$  839.57  $[M+H]^+$ , (red colored letter denoted fragment ions generated toward C-terminus, black colored letter denoted fragment ions toward N-terminus). The other detected fragment ions are listed in Table S8.

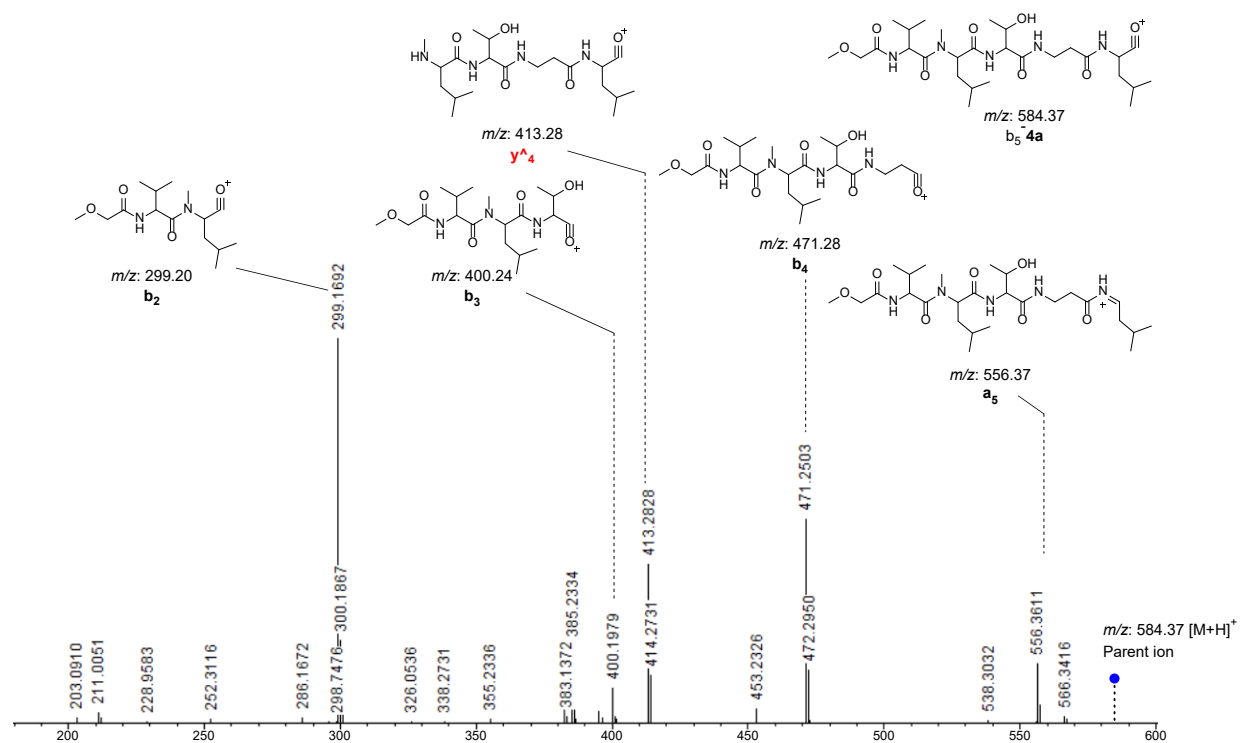

**Figure S16.** MS/MS/MS spectrum of fragment ion  $b_5$  of **4a**,  $m/z$  584.37  $[M+H]^+$ , (red colored letter denoted fragment ions generated toward C-terminus, black colored letter denoted fragment ions toward N-terminus).

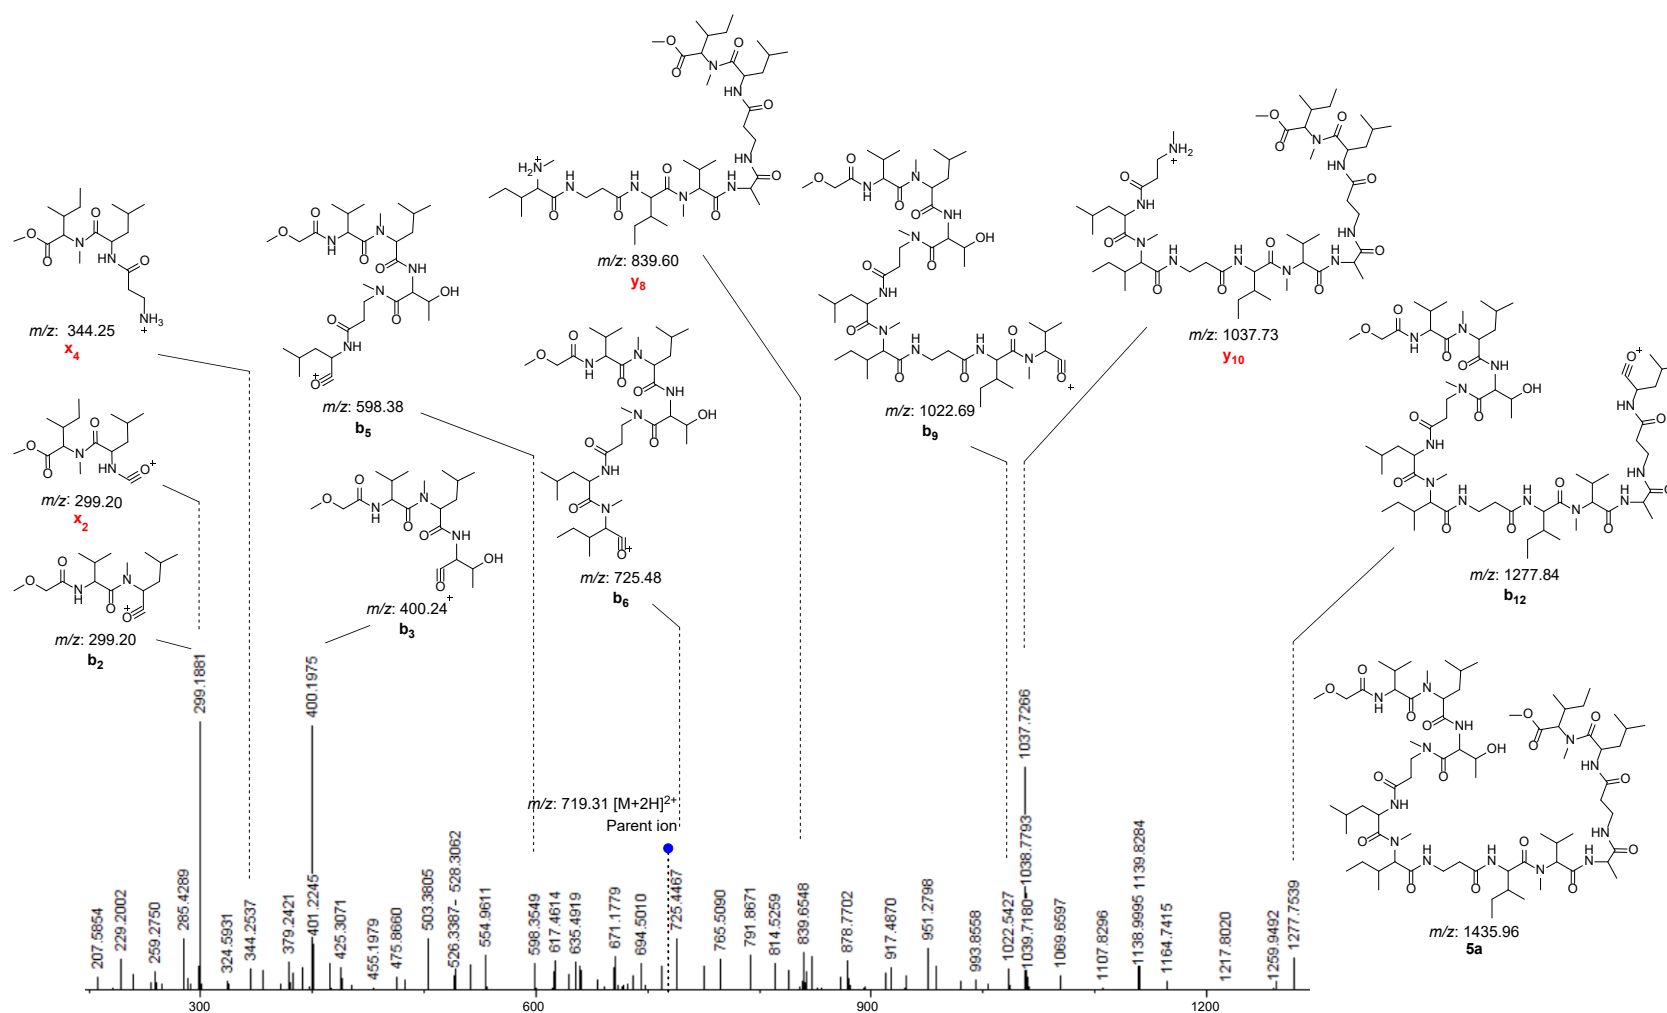

**Figure S17.** MS/MS spectrum of *seco*-acid methyl ester peptide **5a**,  $m/z$  719.31  $[M+2H]^{2+}$ , (red colored letter denoted fragment ions generated toward C-terminus, black colored letter denoted fragment ions toward N-terminus). The other detected fragment ions are listed in Table S9.

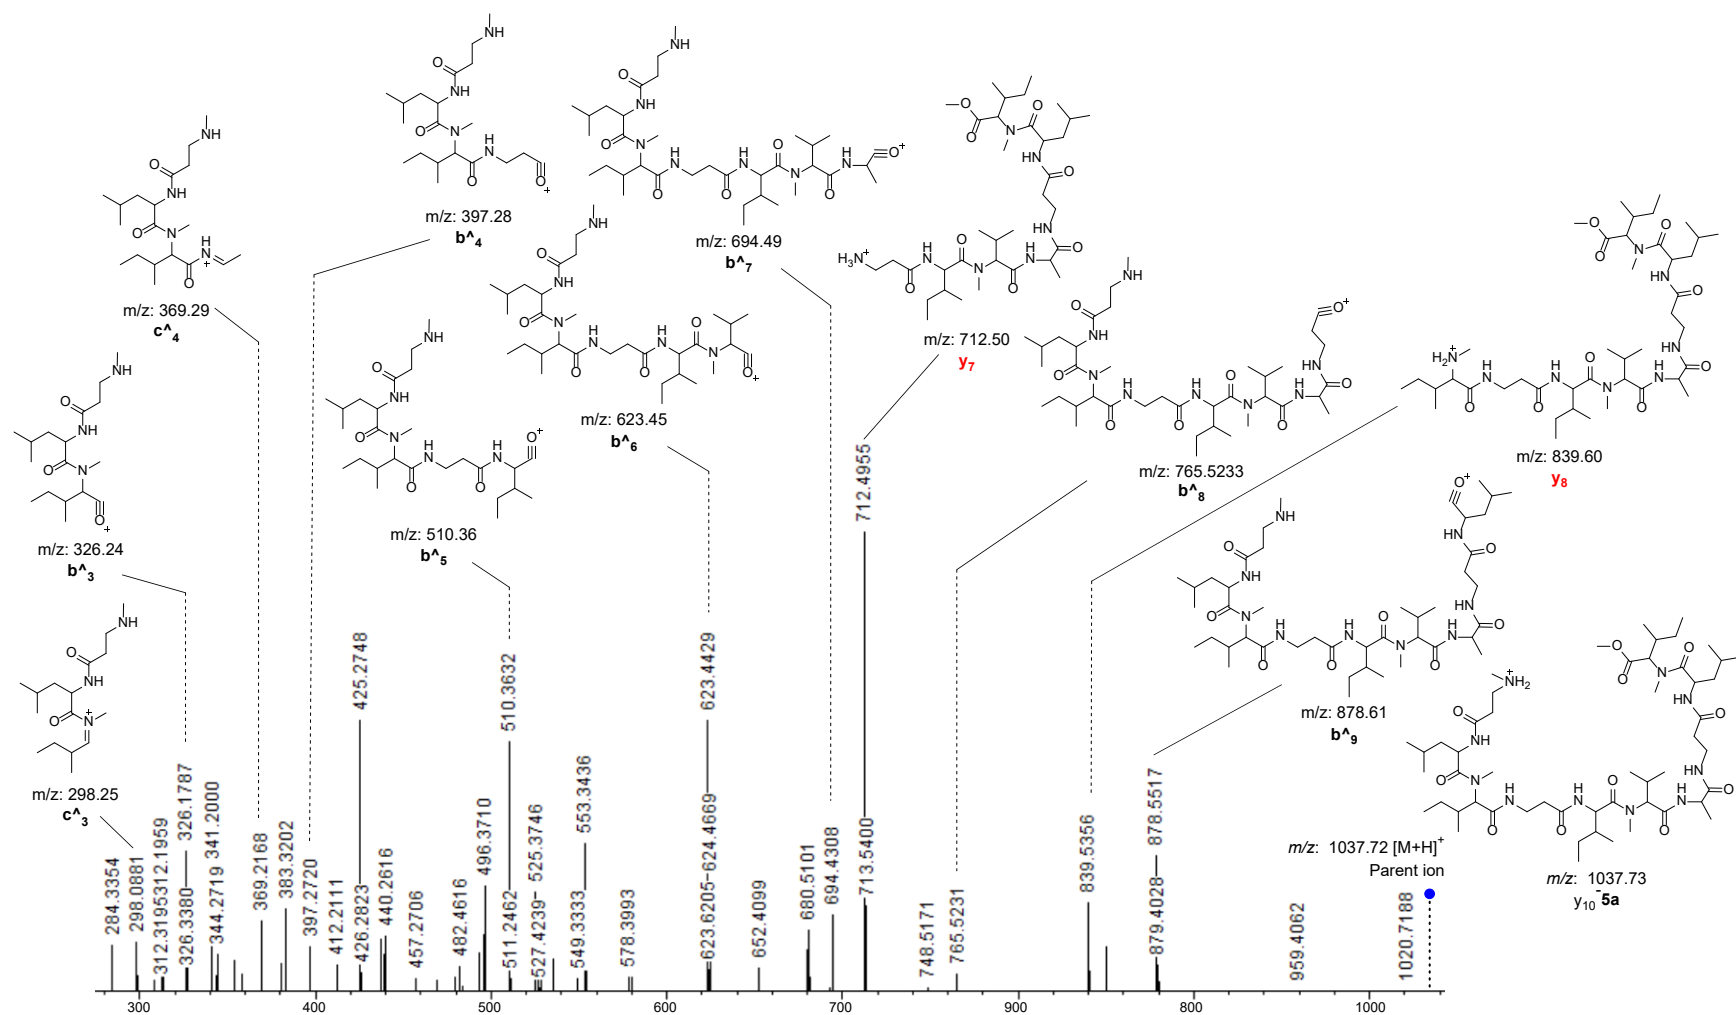

**Figure S18.** MS/MS/MS spectrum of fragment ion  $y_{10}$  of **5a**,  $m/z$  1037.72  $[M+H]^+$ , (red colored letter denoted fragment ions generated toward C-terminus, black colored letter denoted fragment ions toward N-terminus). The other detected fragment ions are listed in Table S10.

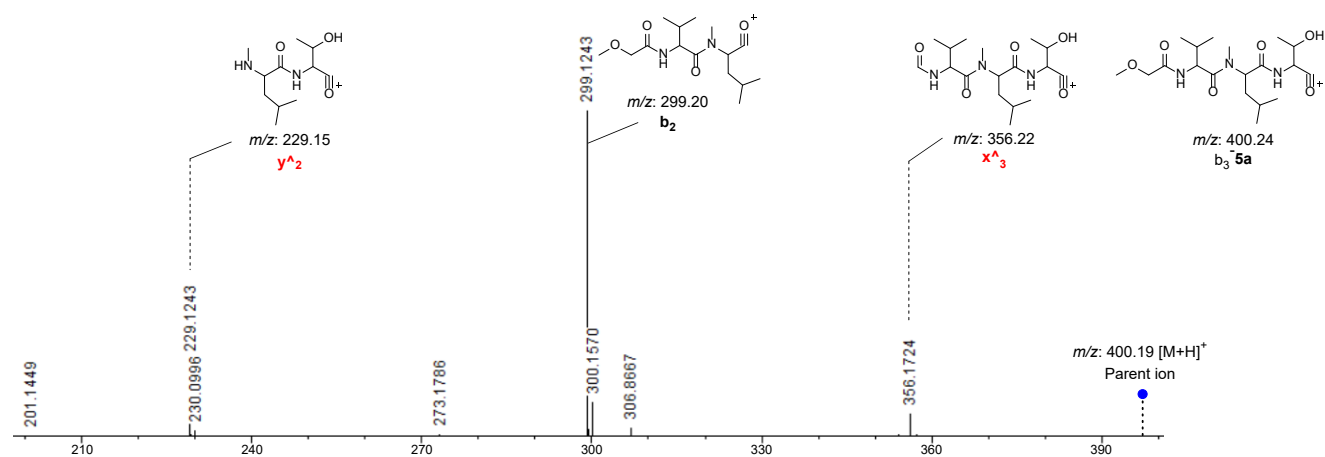

**Figure S19.** MS/MS/MS spectrum of fragment ion  $b_3$  of **5a**,  $m/z$  400.19  $[M+H]^+$ , (red colored letter denoted fragment ions generated toward C-terminus, black colored letter denoted fragment ions toward N-terminus).

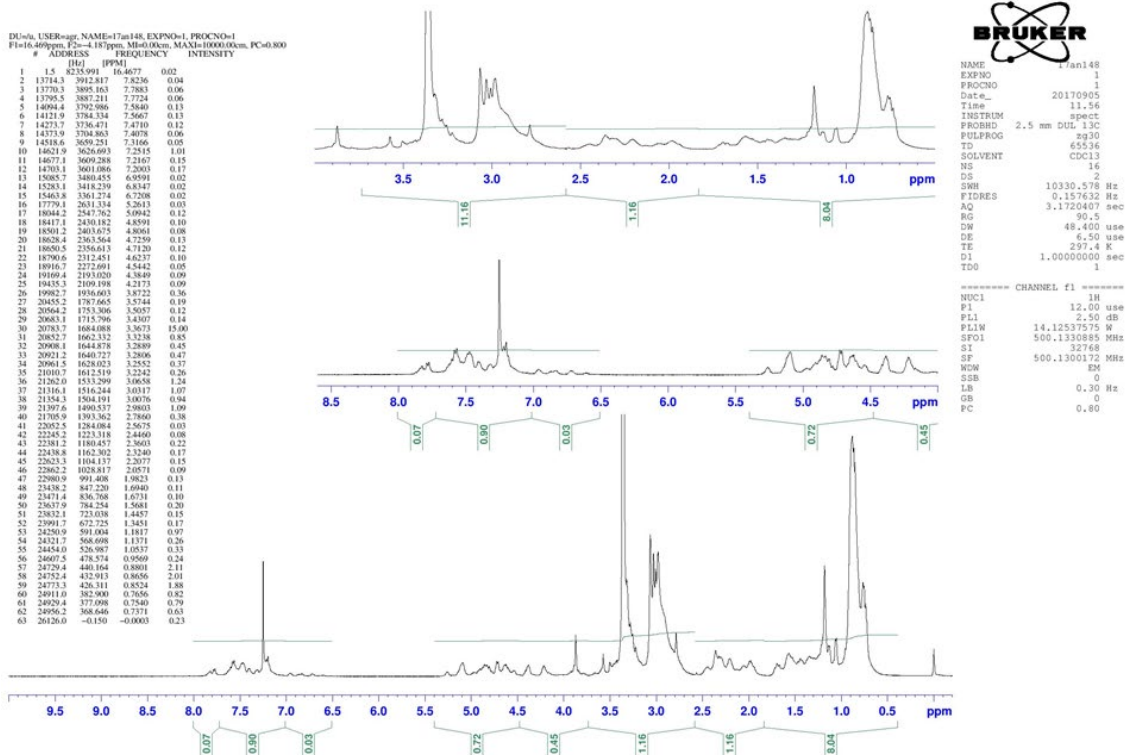

Figure S20.  $^1\text{H}$  NMR spectrum (CDCl<sub>3</sub>, 500 MHz) of compound 1.

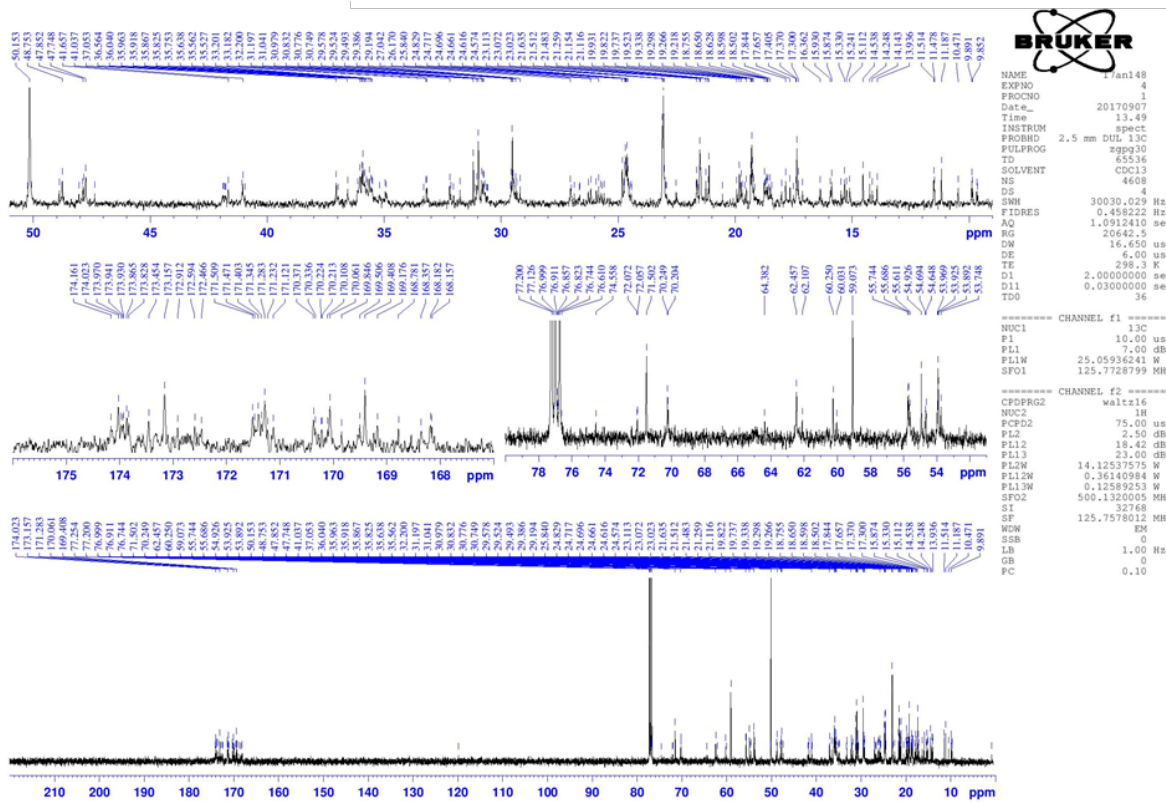

Figure S21.  $^{13}\text{C}$  NMR spectrum (CDCl<sub>3</sub>, 125 MHz) of compound 1.



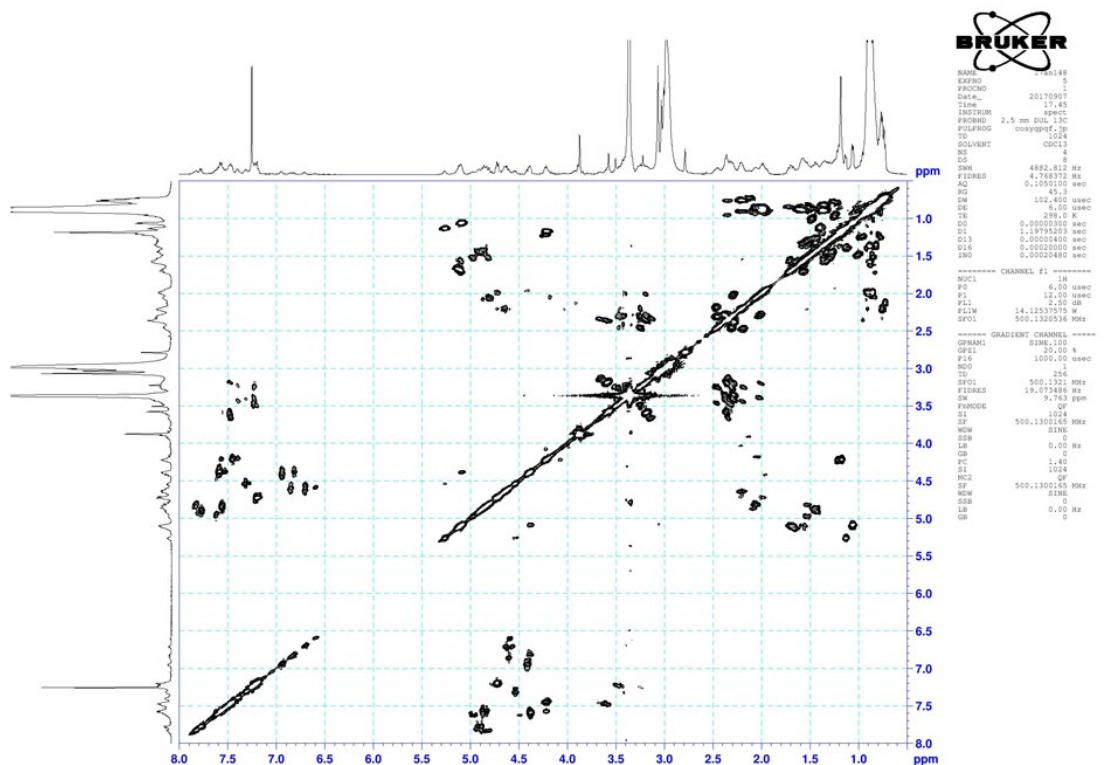

Figure S22. COSY NMR spectrum (CDCl<sub>3</sub>, 500 MHz) of compound 1.

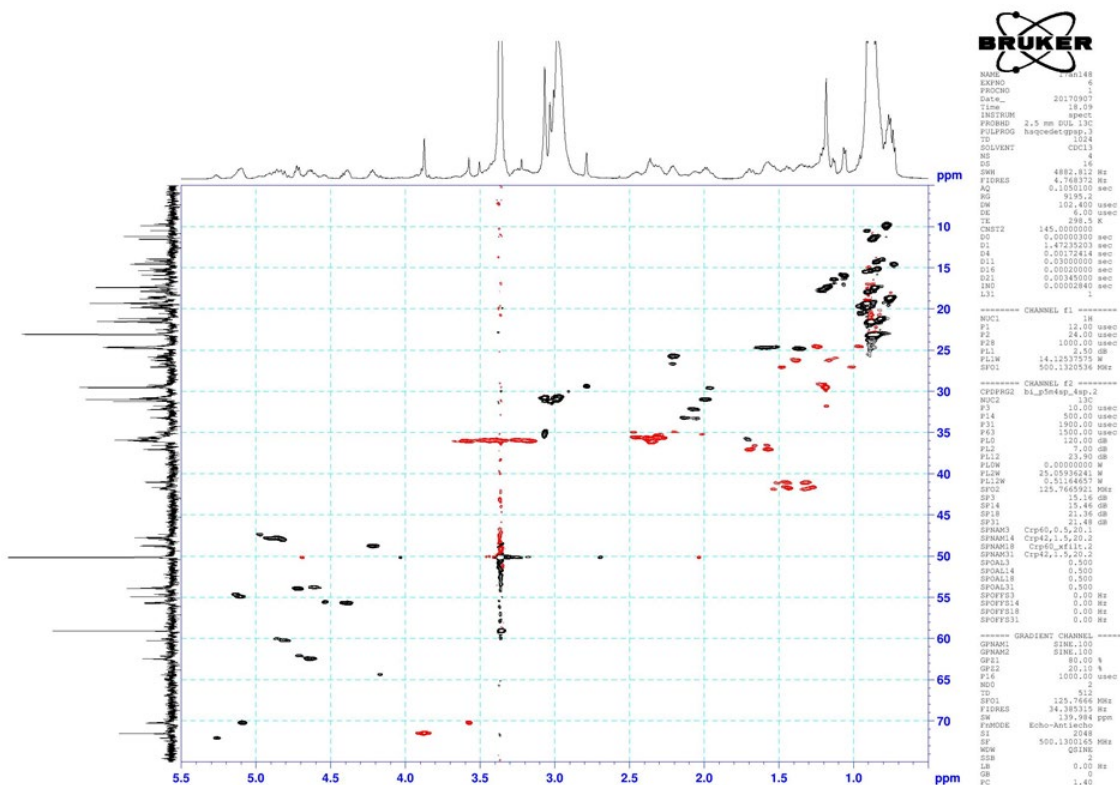

Figure S23. HSQC NMR spectrum (CDCl<sub>3</sub>, 500 MHz) of compound 1.





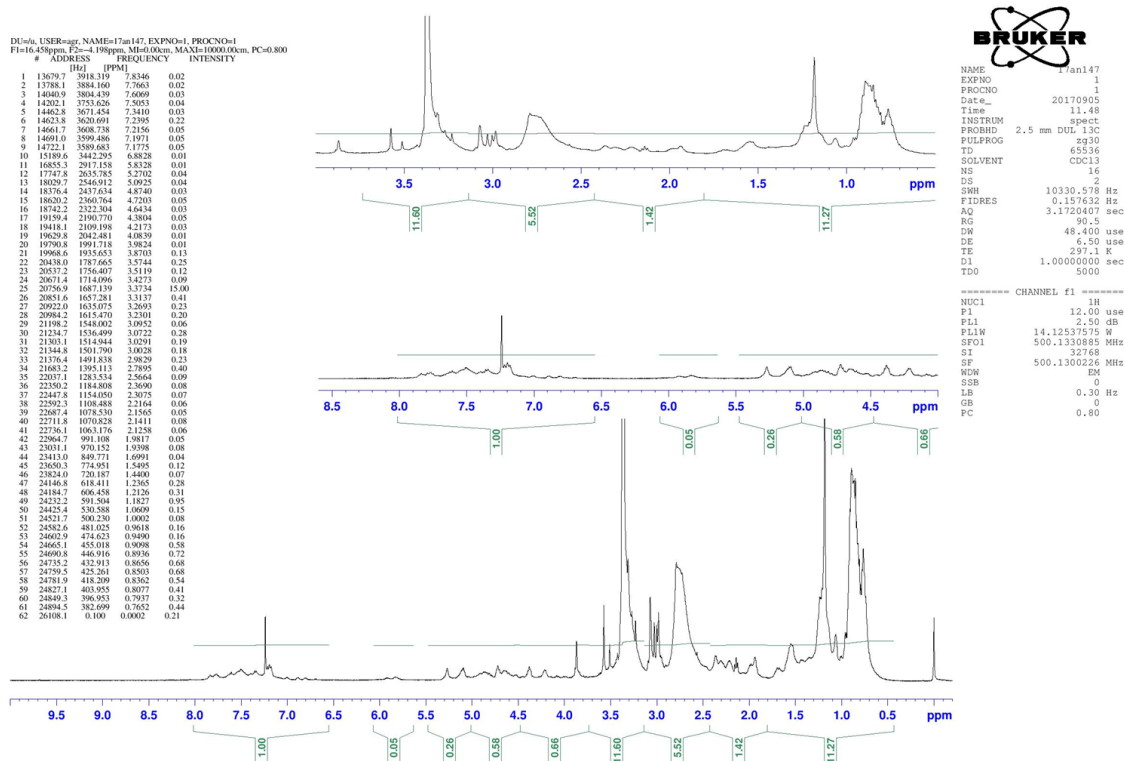

Figure S26.  $^1\text{H}$  NMR spectrum ( $\text{CDCl}_3$ , 500 MHz) of compound 2.

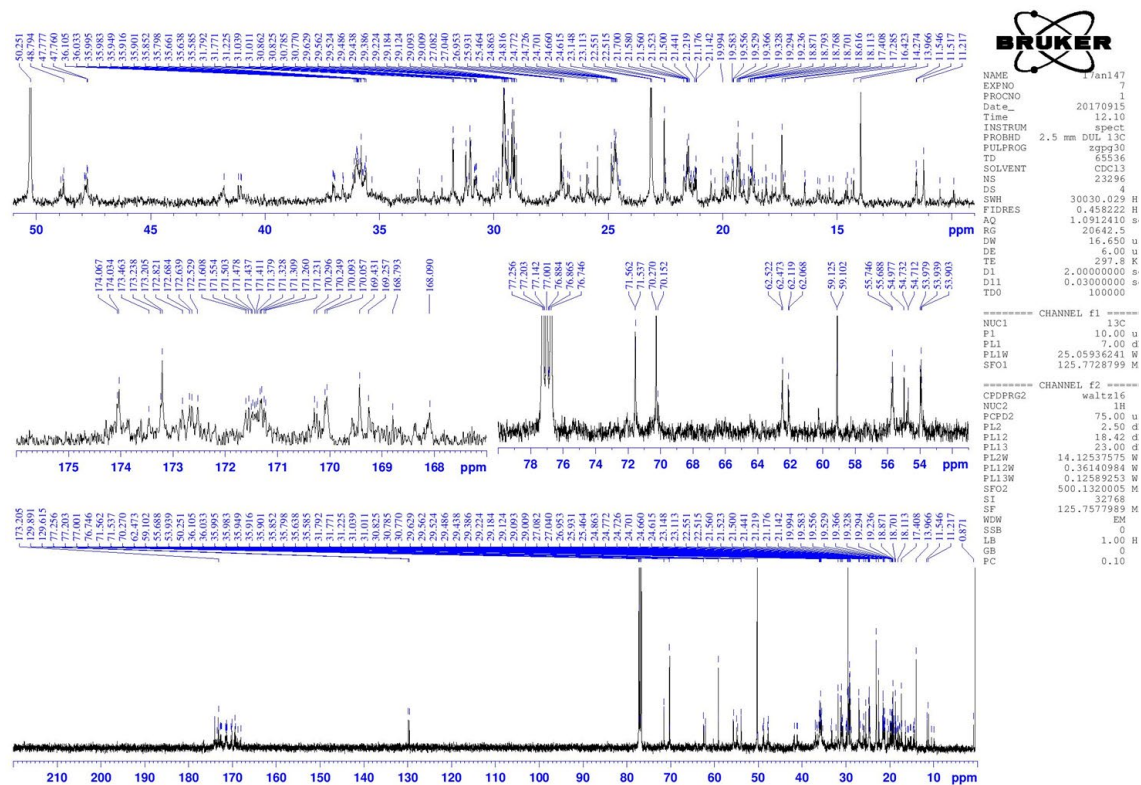

Figure S27.  $^{13}\text{C}$  NMR spectrum ( $\text{CDCl}_3$ , 125 MHz) of compound 2.







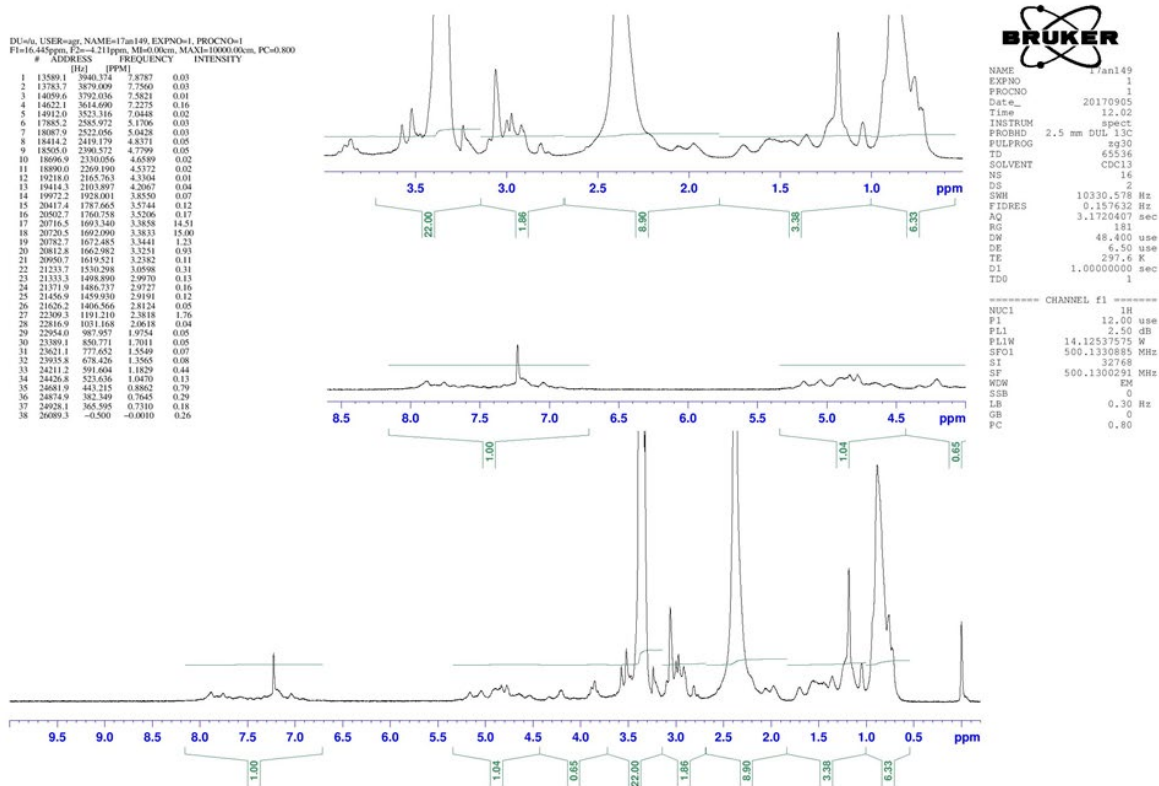

Figure S32.  $^1\text{H}$  NMR spectrum ( $\text{CDCl}_3$ , 500 MHz) of compound 3.

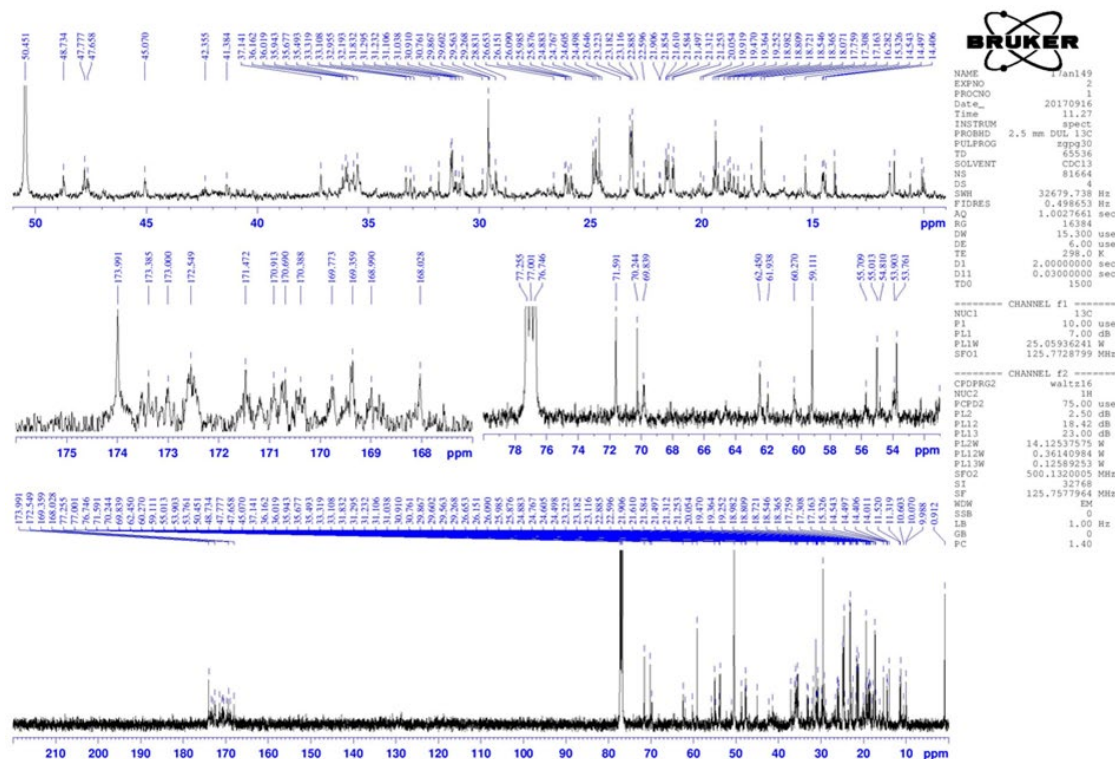

Figure S33.  $^{13}\text{C}$  NMR spectrum ( $\text{CDCl}_3$ , 125 MHz) of compound 3.

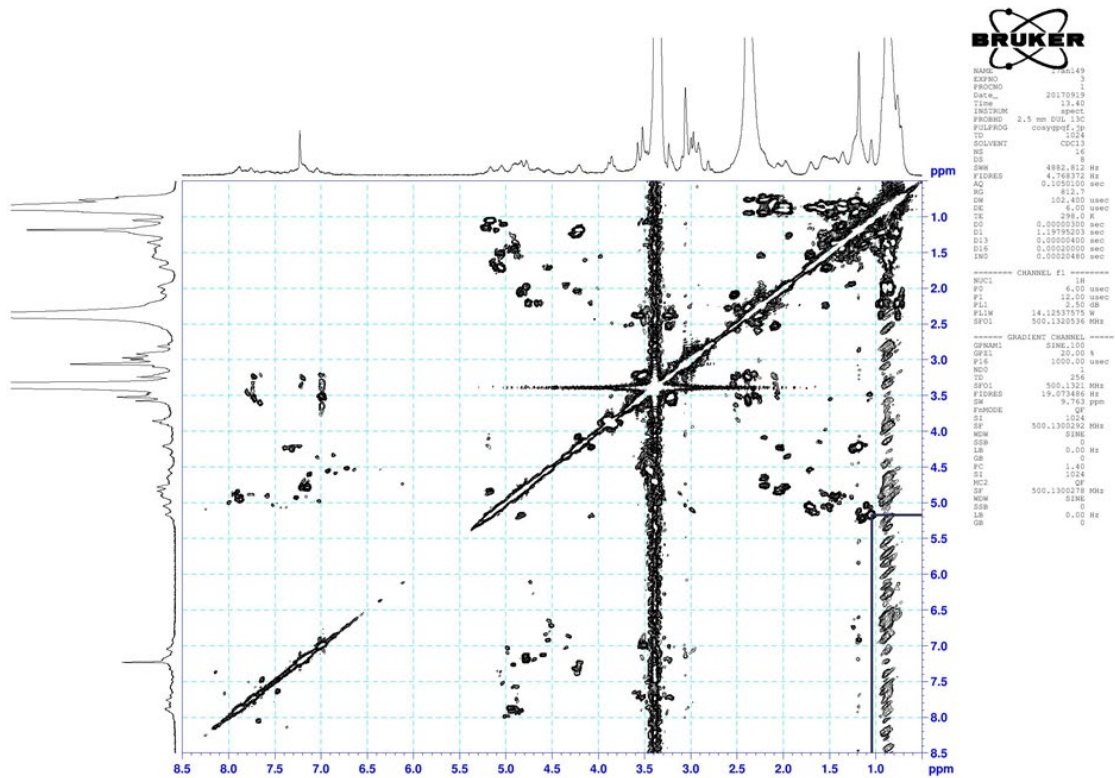

Figure S34. COSY NMR spectrum (CDCl<sub>3</sub>, 500 MHz) of compound **3**.

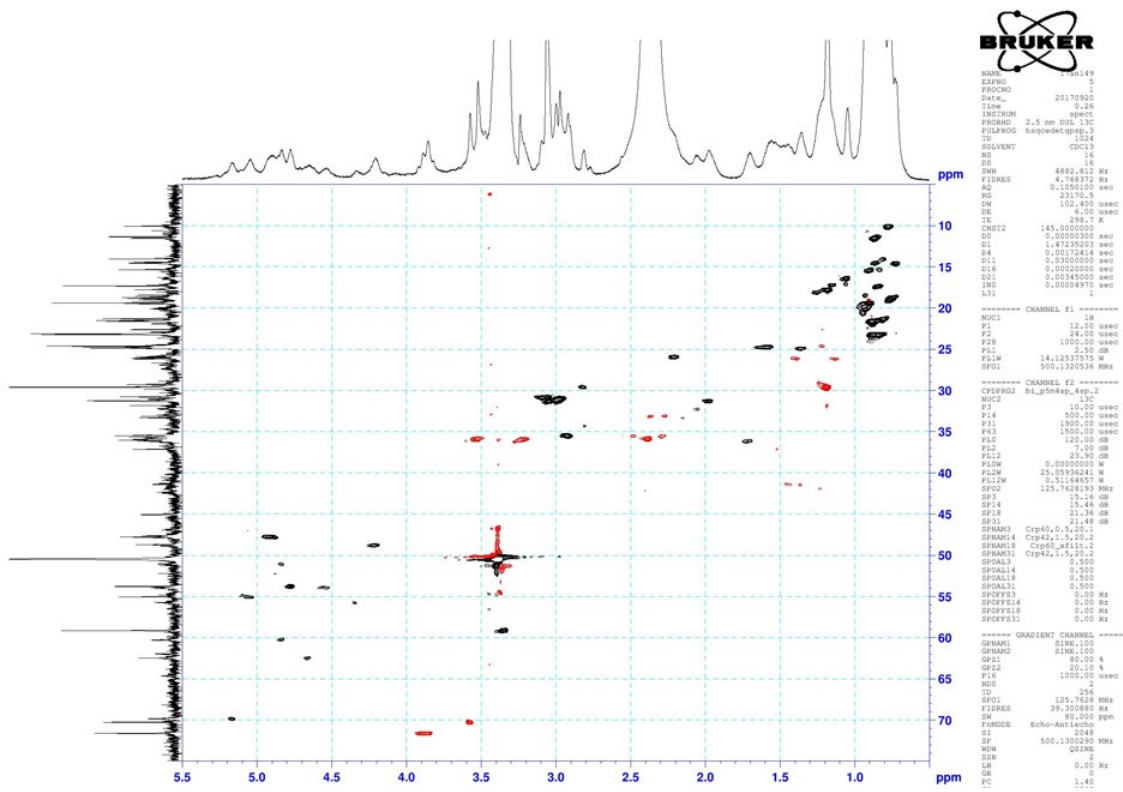

Figure S35. HSQC NMR spectrum (CDCl<sub>3</sub>, 500 MHz) of compound **3**.



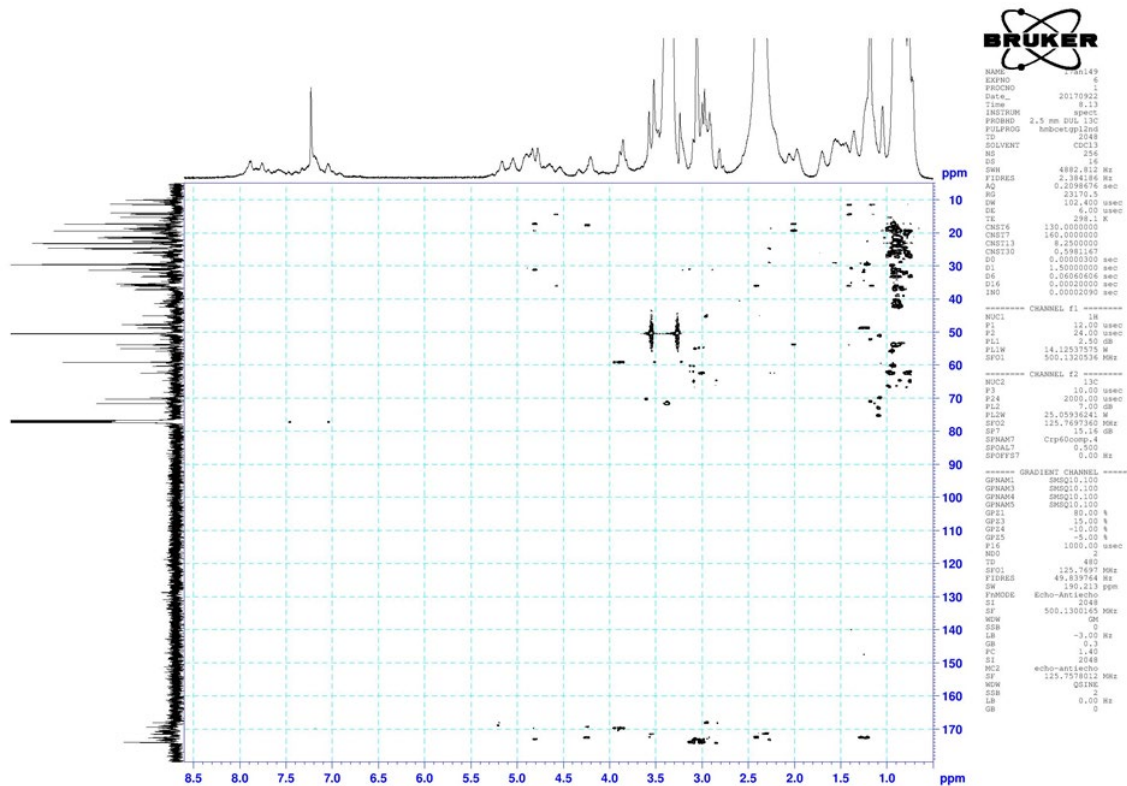

Figure S36. HMBC NMR spectrum (CDCl<sub>3</sub>, 500 MHz) of compound 3.

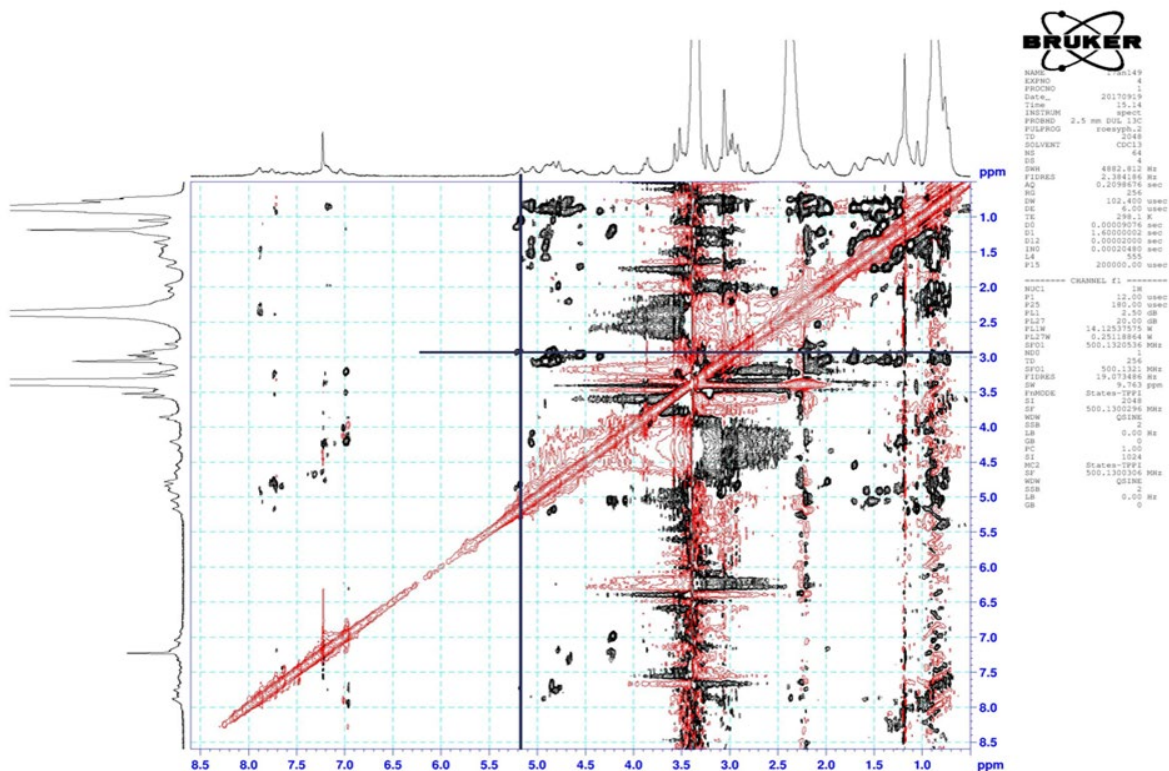

Figure S37. ROESY NMR spectrum (CDCl<sub>3</sub>, 500 MHz) of compound 3.

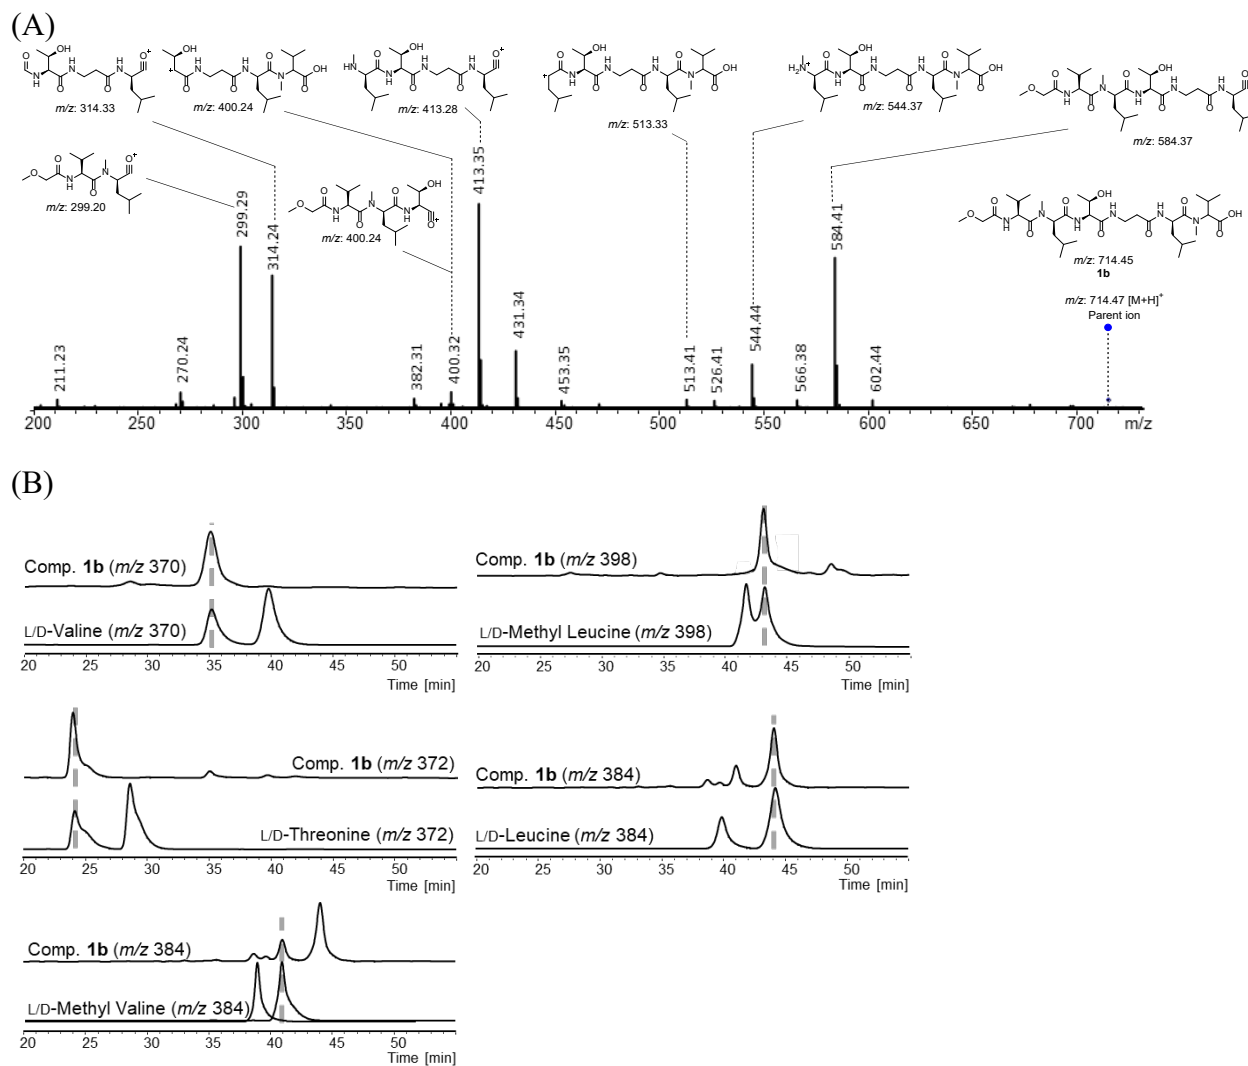

**Figure S38.** Tandem MS analysis of the targeted fragment **1b** derived from the N-terminal part of compound **1** (A), followed with Marfey's analysis to determine its absolute configuration (B).



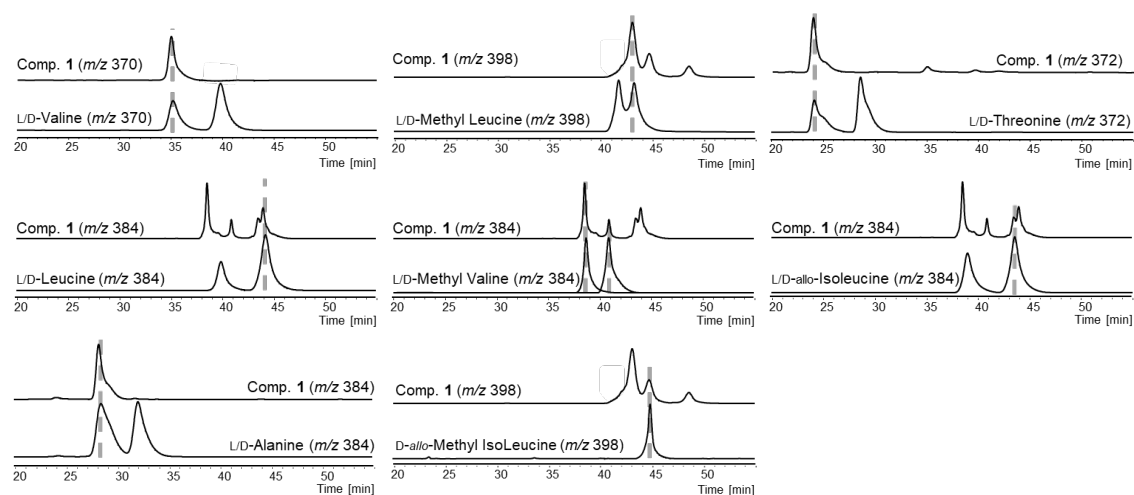

**Figure S39.** Marfey's analysis of the total hydrolysate of compound **1** in comparison with the amino acid standards.

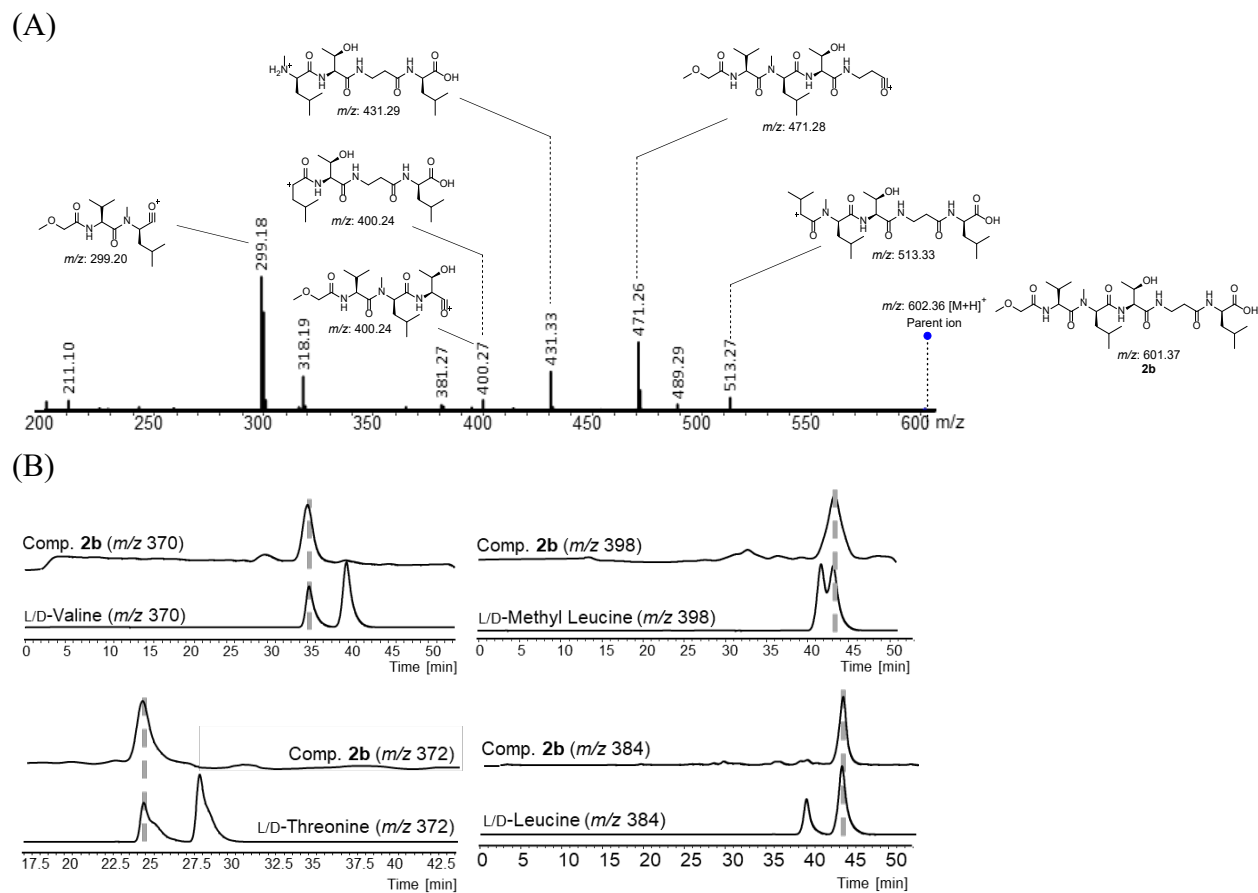

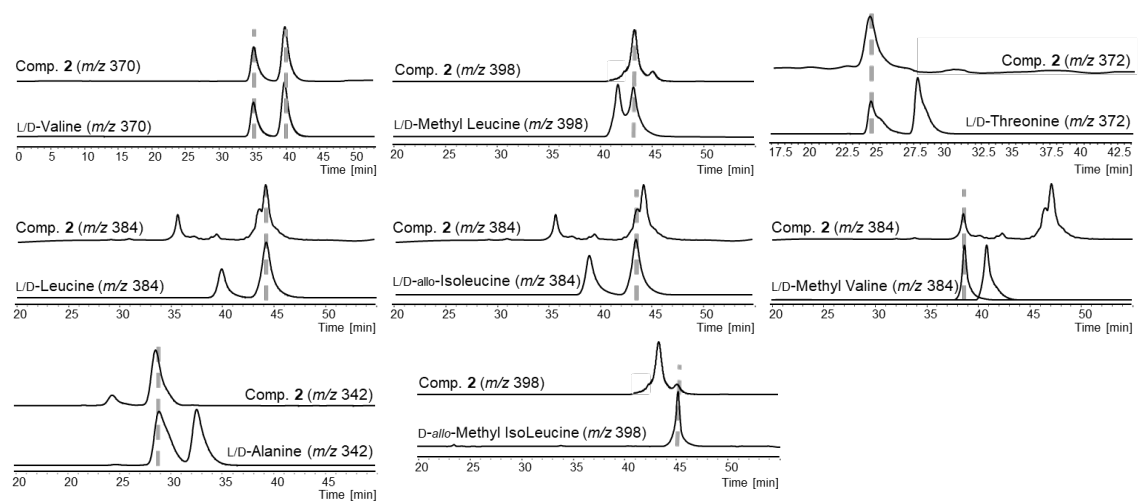

**Figure S41.** Marfey's analysis of the total hydrolysate of compound **2** in comparison with the amino acid standards.

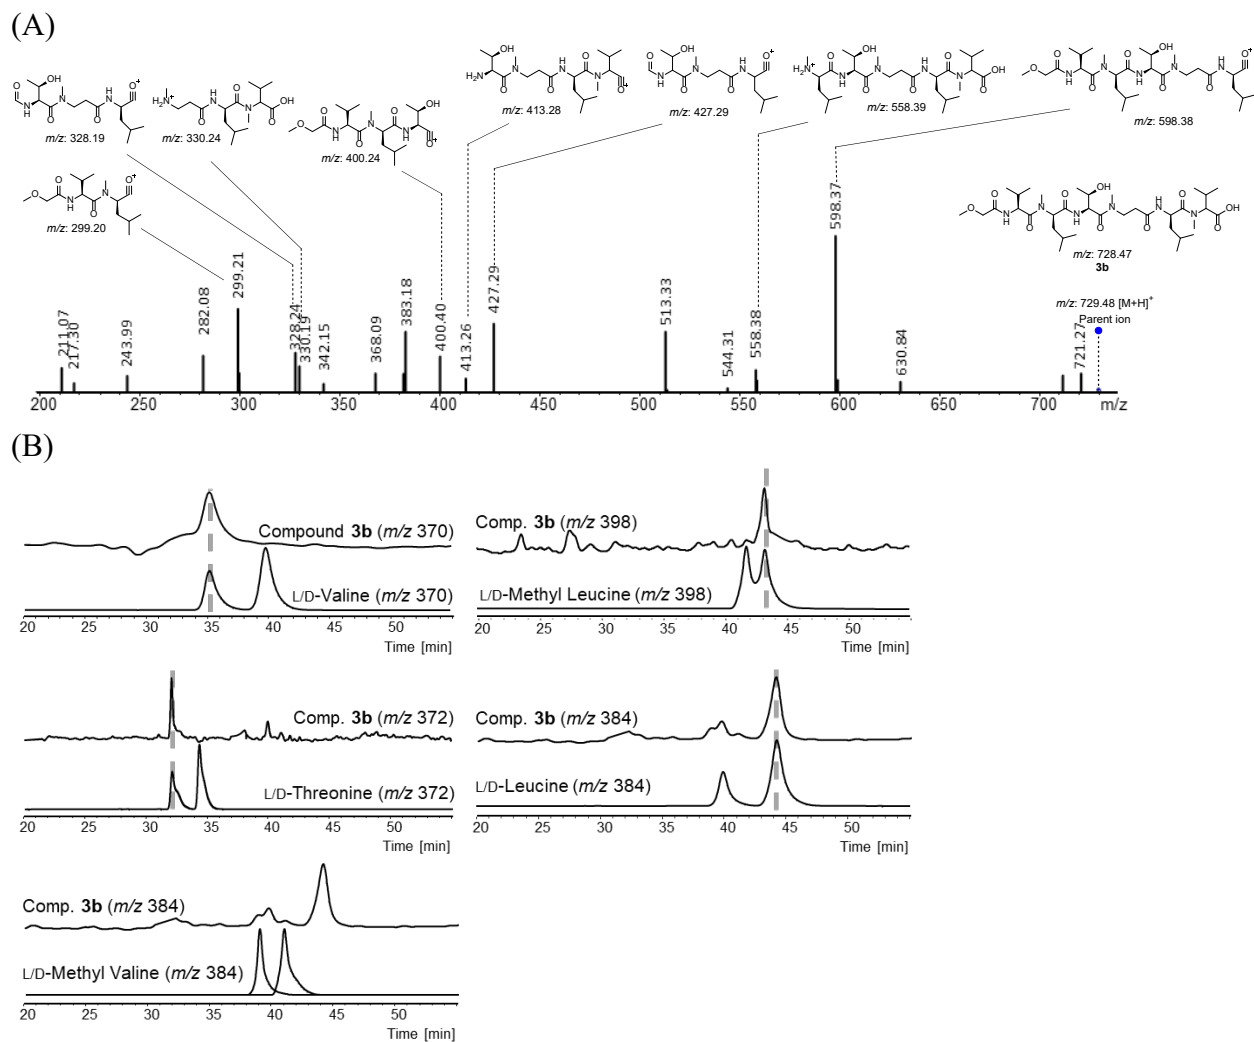

**Figure S42.** Tandem MS analysis of the targeted fragment **3b** derived from the N-terminal part of compound **3** (A), followed with Marfey's analysis to determine its absolute configuration (B).

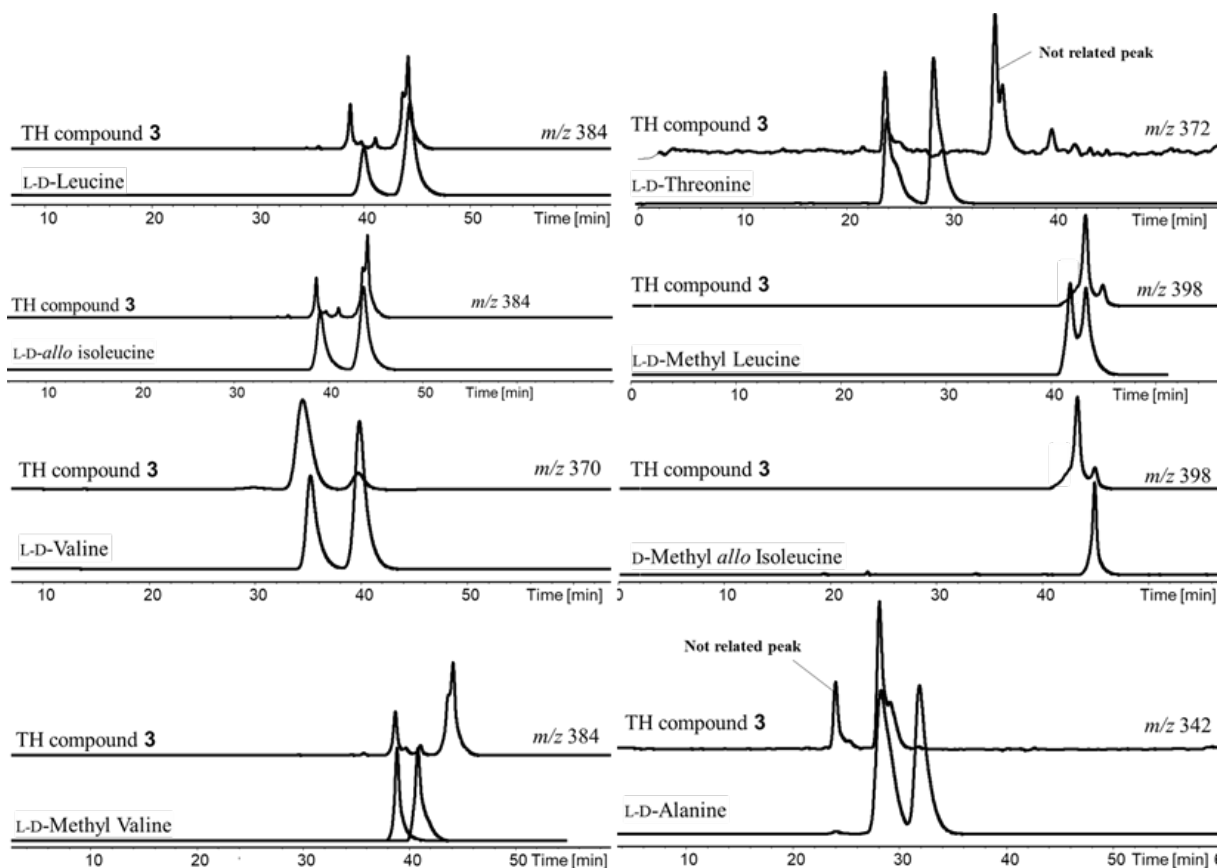

**Figure S43.** Marfey's analysis of the total hydrolysate of compound **3** in comparison with the amino acid standards.

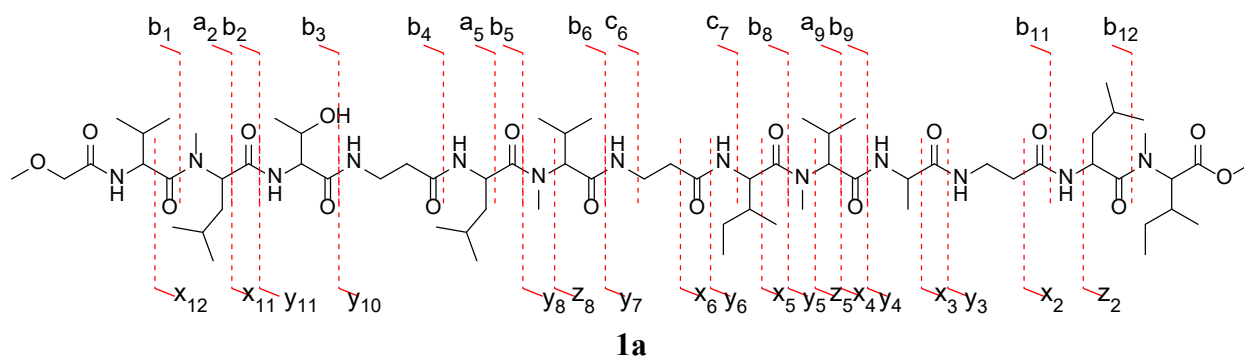

**Table S1.** List of obtained fragment ions from MS/MS analysis of **1a**.

| Ion                              | Calc. (Da) | Obs. (Da) | Δdelta (Da) | Ion                               | Calc. (Da) | Obs. (Da) | Δdelta (Da) |
|----------------------------------|------------|-----------|-------------|-----------------------------------|------------|-----------|-------------|
| b <sub>1</sub>                   | 172.0968   | 172.0716  | 0.0253      | z <sub>2</sub>                    | 256.1907   | 256.1165  | 0.0742      |
| a <sub>2</sub>                   | 271.2016   | 271.1479  | 0.0537      | x <sub>2</sub> +H <sub>2</sub> O  | 317.1965   | 317.2708  | 0.0742      |
| b <sub>2</sub> +H <sub>2</sub> O | 317.1965   | 317.2708  | 0.0742      | x <sub>2</sub>                    | 299.1965   | 299.1774  | 0.0192      |
| b <sub>2</sub>                   | 299.1965   | 299.1774  | 0.0192      | y <sub>3</sub>                    | 344.2544   | 344.3039  | 0.0495      |
| b <sub>3</sub>                   | 400.2442   | 400.0228  | 0.2214      | x <sub>3</sub>                    | 370.2337   | 370.2658  | 0.0322      |
| b <sub>4</sub>                   | 471.2813   | 471.2503  | 0.0310      | z <sub>4</sub> +H <sub>2</sub> O  | 416.2650   | 416.3188  | 0.0539      |
| a <sub>5</sub>                   | 556.3705   | 556.3348  | 0.0356      | y <sub>4</sub>                    | 415.2915   | 415.2365  | 0.0550      |
| b <sub>5</sub>                   | 584.3654   | 584.3572  | 0.0082      | x <sub>4</sub> +H <sub>2</sub> O  | 459.2708   | 459.2392  | 0.0316      |
| b <sub>6</sub>                   | 697.4495   | 697.0222  | 0.4273      | x <sub>4</sub>                    | 441.2708   | 441.2595  | 0.0112      |
| c <sub>6</sub>                   | 714.4760   | 714.6461  | 0.1701      | z <sub>5</sub> +H <sub>2</sub> O  | 515.3334   | 515.9225  | 0.5891      |
| b <sub>7</sub> +H <sub>2</sub> O | 786.4866   | 786.0298  | 0.4568      | z <sub>5</sub>                    | 497.3334   | 497.3955  | 0.0622      |
| c <sub>7</sub>                   | 785.5131   | 785.9608  | 0.4477      | y <sub>5</sub>                    | 528.3756   | 528.4362  | 0.0607      |
| b <sub>8</sub>                   | 881.5706   | 881.6166  | 0.0460      | x <sub>5</sub> +H <sub>2</sub> O  | 572.3548   | 572.3600  | 0.0052      |
| a <sub>9</sub>                   | 966.6598   | 966.5709  | 0.0889      | x <sub>5</sub>                    | 554.3548   | 554.5071  | 0.1523      |
| b <sub>9</sub>                   | 994.6547   | 994.7037  | 0.0490      | z <sub>6</sub> +H <sub>2</sub> O  | 642.4331   | 642.0222  | 0.4109      |
| b <sub>11</sub>                  | 1136.7289  | 1136.7332 | 0.0042      | y <sub>6</sub>                    | 641.4596   | 641.3369  | 0.1227      |
| b <sub>12</sub>                  | 1249.8130  | 1249.8666 | 0.0536      | x <sub>6</sub>                    | 667.4389   | 667.4990  | 0.0601      |
|                                  |            |           |             | z <sub>7</sub> +H <sub>2</sub> O  | 713.4702   | 713.6125  | 0.1423      |
|                                  |            |           |             | y <sub>7</sub>                    | 712.4967   | 712.4990  | 0.0023      |
|                                  |            |           |             | z <sub>8</sub>                    | 794.5386   | 794.5554  | 0.0168      |
|                                  |            |           |             | y <sub>8</sub>                    | 825.5805   | 825.6157  | 0.0352      |
|                                  |            |           |             | z <sub>9</sub> +H <sub>2</sub> O  | 939.6383   | 939.3075  | 0.3308      |
|                                  |            |           |             | z <sub>10</sub> +H <sub>2</sub> O | 1010.6754  | 1010.5914 | 0.0841      |
|                                  |            |           |             | y <sub>10</sub>                   | 1009.7020  | 1009.6266 | 0.0754      |
|                                  |            |           |             | z <sub>11</sub> +H <sub>2</sub> O | 1111.7231  | 1111.6885 | 0.0346      |
|                                  |            |           |             | y <sub>11</sub>                   | 1110.7497  | 1110.7552 | 0.0056      |
|                                  |            |           |             | x <sub>11</sub>                   | 1136.7289  | 1136.7332 | 0.0042      |
|                                  |            |           |             | x <sub>12</sub>                   | 1263.8286  | 1263.8693 | 0.0406      |

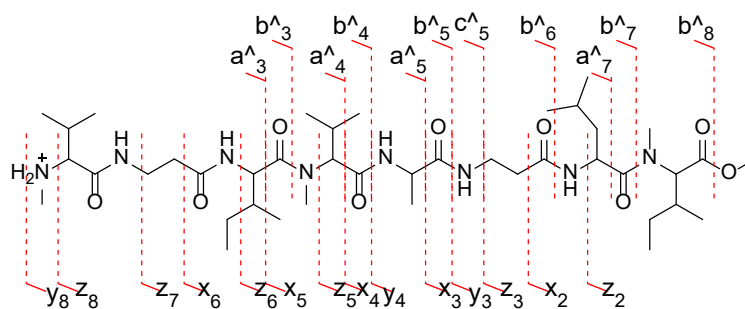

**y<sub>8</sub>-1a**

**Table S2.** List of obtained fragment ions from MS/MS/MS analysis of y<sub>8</sub>-1a.

| Ion            | Calc. (Da) | Obs. (Da) | Δdelta (Da) | Ion                              | Calc. (Da) | Obs. (Da) | Δdelta (Da) |
|----------------|------------|-----------|-------------|----------------------------------|------------|-----------|-------------|
| a <sup>3</sup> | 270.2176   | 270.1913  | 0.0263      | z <sub>2</sub>                   | 256.1907   | 256.0798  | 0.1109      |
| b <sup>3</sup> | 298.2125   | 298.1420  | 0.0705      | x <sub>2</sub>                   | 299.1965   | 299.1702  | 0.0263      |
| a <sup>4</sup> | 383.3017   | 383.3098  | 0.0081      | z <sub>3</sub>                   | 327.2278   | 327.2412  | 0.0134      |
| b <sup>4</sup> | 411.2966   | 411.2961  | 0.0005      | y <sub>3</sub>                   | 344.2544   | 344.2126  | 0.0418      |
| a <sup>5</sup> | 454.3388   | 454.3857  | 0.0469      | x <sub>3</sub>                   | 370.2337   | 370.2788  | 0.0452      |
| b <sup>5</sup> | 482.3337   | 482.3195  | 0.0142      | y <sub>4</sub>                   | 415.2915   | 415.2700  | 0.0215      |
| c <sup>5</sup> | 499.3603   | 499.3214  | 0.0388      | x <sub>4</sub>                   | 441.2708   | 441.3353  | 0.0645      |
| b <sup>6</sup> | 553.3708   | 553.3790  | 0.0082      | z <sub>5</sub> +H <sub>2</sub> O | 515.3334   | 515.2952  | 0.0381      |
| a <sup>7</sup> | 638.4600   | 638.5156  | 0.0556      | z <sub>5</sub>                   | 497.3334   | 497.3034  | 0.0300      |
| b <sup>7</sup> | 666.4549   | 666.4556  | 0.0007      | y <sub>5</sub>                   | 528.3756   | 528.4121  | 0.0365      |
| b <sup>8</sup> | 793.5546   | 793.5571  | 0.0025      | x <sub>5</sub>                   | 554.3548   | 554.3976  | 0.0428      |
|                |            |           |             | z <sub>6</sub>                   | 624.4331   | 624.4590  | 0.0260      |
|                |            |           |             | x <sub>6</sub>                   | 667.4389   | 667.4561  | 0.0172      |
|                |            |           |             | z <sub>8</sub>                   | 794.5386   | 794.6066  | 0.0680      |

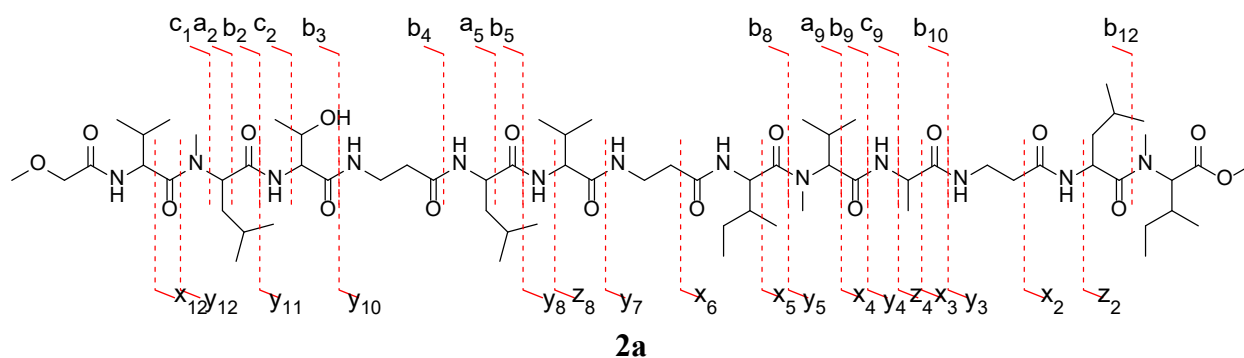

**Table S3.** List of obtained fragment ions from MS/MS analysis of **2a**.

| Ion                               | Calc. (Da) | Obs. (Da) | Δdelta (Da) | Ion                               | Calc. (Da) | Obs. (Da) | Δdelta (Da) |
|-----------------------------------|------------|-----------|-------------|-----------------------------------|------------|-----------|-------------|
| c <sub>1</sub>                    | 203.1390   | 203.0924  | 0.0467      | z <sub>2</sub>                    | 256.1907   | 256.1545  | 0.0362      |
| a <sub>2</sub>                    | 271.2016   | 271.1439  | 0.0578      | x <sub>2</sub>                    | 299.1965   | 299.2136  | 0.0171      |
| b <sub>2</sub>                    | 299.1965   | 299.2136  | 0.0171      | y <sub>3</sub>                    | 344.2544   | 344.3035  | 0.0491      |
| c <sub>2</sub>                    | 316.2231   | 316.2105  | 0.0125      | x <sub>3</sub>                    | 370.2337   | 370.2604  | 0.0268      |
| b <sub>3</sub>                    | 400.2442   | 400.2528  | 0.0086      | z <sub>4</sub>                    | 398.2650   | 398.2693  | 0.0044      |
| b <sub>4</sub>                    | 471.2813   | 471.3384  | 0.0570      | y <sub>4</sub>                    | 415.2915   | 415.3503  | 0.0588      |
| a <sub>5</sub>                    | 556.3705   | 556.3973  | 0.0268      | x <sub>4</sub>                    | 441.2708   | 441.3018  | 0.0310      |
| b <sub>5</sub>                    | 584.3654   | 584.3900  | 0.0246      | y <sub>5</sub>                    | 528.3756   | 528.4907  | 0.1151      |
| b <sub>5</sub> + H <sub>2</sub> O | 602.3654   | 602.4204  | 0.0550      | x <sub>5</sub>                    | 554.3548   | 554.3870  | 0.0322      |
| a <sub>6</sub> + H <sub>2</sub> O | 673.4389   | 673.5240  | 0.0851      | x <sub>6</sub>                    | 667.4389   | 667.5293  | 0.0904      |
| b <sub>8</sub>                    | 867.5550   | 867.7025  | 0.1475      | y <sub>7</sub>                    | 712.4967   | 712.5329  | 0.0362      |
| a <sub>9</sub>                    | 952.6441   | 952.8411  | 0.1969      | z <sub>8</sub>                    | 794.5386   | 794.6181  | 0.0795      |
| b <sub>9</sub>                    | 980.6391   | 980.8881  | 0.2491      | y <sub>8</sub>                    | 811.5652   | 811.6312  | 0.0660      |
| c <sub>9</sub>                    | 997.6656   | 997.3965  | 0.2690      | x <sub>8</sub> +H <sub>2</sub> O  | 855.5444   | 855.4921  | 0.0523      |
| b <sub>10</sub>                   | 1051.6762  | 1051.7500 | 0.0738      | z <sub>10</sub> +H <sub>2</sub> O | 996.6598   | 996.7625  | 0.1027      |
| a <sub>11</sub> +H <sub>2</sub> O | 1112.7184  | 1112.7456 | 0.0272      | y <sub>10</sub>                   | 995.6863   | 995.7158  | 0.0295      |
| b <sub>12</sub>                   | 1235.7973  | 1235.7866 | 0.0107      | z <sub>11</sub> +H <sub>2</sub> O | 1097.7075  | 1097.8020 | 0.0945      |
|                                   |            |           |             | y <sub>11</sub>                   | 1096.7340  | 1096.8569 | 0.1229      |
|                                   |            |           |             | y <sub>12</sub>                   | 1223.8337  | 1223.7208 | 0.1129      |
|                                   |            |           |             | x <sub>12</sub>                   | 1249.8130  | 1249.8978 | 0.0848      |



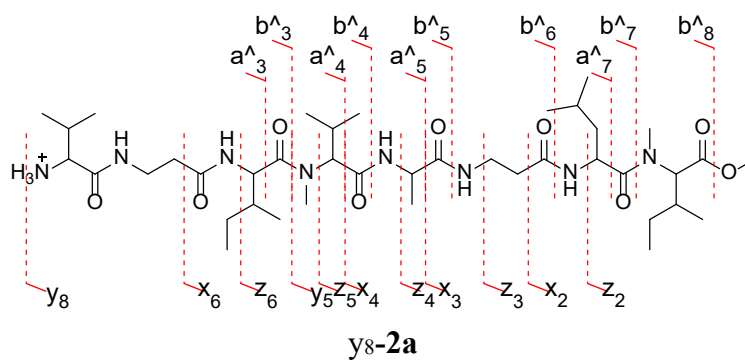

**Table S4.** List of obtained fragment ions from MS/MS/MS analysis of y<sub>8</sub>-2a.

| Ion            | Calc. (Da) | Obs. (Da) | Δdelta (Da) | Ion            | Calc. (Da) | Obs. (Da) | Δdelta (Da) |
|----------------|------------|-----------|-------------|----------------|------------|-----------|-------------|
| a <sup>3</sup> | 256.2020   | 256.2199  | 0.0180      | z <sub>2</sub> | 256.1907   | 256.2199  | 0.0292      |
| b <sup>3</sup> | 284.1969   | 284.1956  | 0.0013      | x <sub>2</sub> | 299.1965   | 299.1811  | 0.0155      |
| a <sup>4</sup> | 369.2860   | 369.2751  | 0.0109      | z <sub>3</sub> | 327.2278   | 327.2722  | 0.0444      |
| b <sup>4</sup> | 397.2809   | 397.2563  | 0.0247      | x <sub>3</sub> | 370.2337   | 370.2709  | 0.0373      |
| a <sup>5</sup> | 440.3231   | 440.2814  | 0.0418      | z <sub>4</sub> | 398.2650   | 398.3205  | 0.0556      |
| b <sup>5</sup> | 468.3181   | 468.3733  | 0.0553      | x <sub>4</sub> | 441.2708   | 441.3669  | 0.0962      |
| b <sup>6</sup> | 539.3552   | 539.2705  | 0.0847      | z <sub>5</sub> | 497.3336   | 497.3200  | 0.0136      |
| a <sup>7</sup> | 624.4443   | 624.3962  | 0.0481      | y <sub>5</sub> | 528.3756   | 528.3950  | 0.0195      |
| b <sup>7</sup> | 652.4392   | 652.4911  | 0.0519      | z <sub>6</sub> | 624.4331   | 624.3962  | 0.0368      |
| b <sup>8</sup> | 779.5389   | 779.5640  | 0.0250      | x <sub>6</sub> | 667.4389   | 667.4293  | 0.0096      |

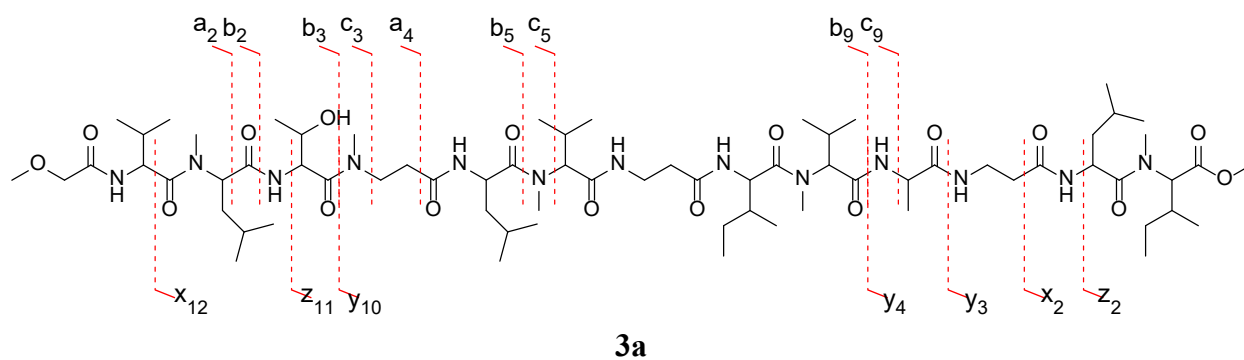

**Table S5.** List of obtained fragment ions from MS/MS analysis of **3a**.

| Ion                              | Calc. (Da) | Obs. (Da) | $\Delta$ delta (Da) | Ion                               | Calc. (Da) | Obs. (Da) | $\Delta$ delta (Da) |
|----------------------------------|------------|-----------|---------------------|-----------------------------------|------------|-----------|---------------------|
| a <sub>2</sub>                   | 271.2016   | 271.1167  | 0.0850              | z <sub>2</sub>                    | 256.1907   | 256.2096  | 0.0189              |
| b <sub>2</sub>                   | 299.1965   | 299.1906  | 0.0060              | x <sub>2</sub>                    | 299.1965   | 299.1906  | 0.0060              |
| b <sub>3</sub>                   | 400.2442   | 400.2771  | 0.0329              | y <sub>3</sub>                    | 344.2544   | 344.1664  | 0.0880              |
| c <sub>3</sub> +H <sub>2</sub> O | 449.3864   | 449.9526  | 0.5662              | z <sub>4</sub> +H <sub>2</sub> O  | 416.2650   | 416.5485  | 0.2836              |
| c <sub>3</sub>                   | 431.3864   | 431.1473  | 0.2391              | y <sub>4</sub>                    | 415.2915   | 415.2530  | 0.0385              |
| a <sub>4</sub>                   | 457.3021   | 457.1173  | 0.1848              | y <sub>8</sub> +H <sub>2</sub> O  | 843.5808   | 843.9647  | 0.3839              |
| b <sub>5</sub>                   | 598.3810   | 598.4725  | 0.0915              | y <sub>10</sub>                   | 1023.7176  | 1023.7256 | 0.0080              |
| c <sub>5</sub>                   | 629.4232   | 629.4316  | 0.0083              | z <sub>11</sub> +H <sub>2</sub> O | 1125.7388  | 1125.7288 | 0.0100              |
| b <sub>9</sub>                   | 1008.6704  | 1008.6068 | 0.0635              | y <sub>11</sub>                   | 1124.7653  | 1124.7495 | 0.0158              |
| c <sub>9</sub>                   | 1025.6969  | 1025.7659 | 0.0690              | x <sub>12</sub>                   | 1277.8443  | 1277.8545 | 0.0102              |

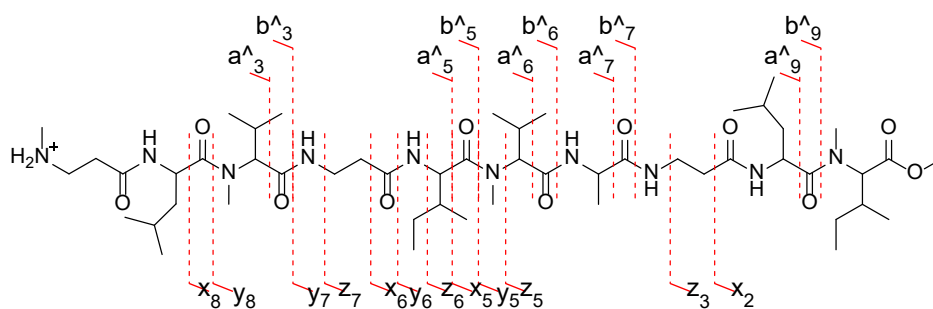

y<sub>10</sub>-3a

**Table S6.** List of obtained fragment ions from MS/MS/MS analysis of y<sub>10</sub>-3a.

| Ion                              | Calc. (Da) | Obs. (Da) | Δdelta (Da) | Ion                              | Calc. (Da) | Obs. (Da) | Δdelta (Da) |
|----------------------------------|------------|-----------|-------------|----------------------------------|------------|-----------|-------------|
| a <sup>3</sup>                   | 284.2333   | 284.1164  | 0.1169      | x <sub>2</sub>                   | 299.1965   | 299.1617  | 0.0348      |
| b <sup>3</sup>                   | 312.2282   | 312.1706  | 0.0576      | z <sub>3</sub>                   | 327.2278   | 327.1898  | 0.0381      |
| a <sup>4</sup> +H <sub>2</sub> O | 373.2704   | 373.2407  | 0.0296      | z <sub>5</sub>                   | 497.3334   | 497.2705  | 0.0629      |
| a <sup>5</sup>                   | 468.3544   | 468.1800  | 0.1744      | y <sub>5</sub>                   | 528.3756   | 528.3364  | 0.0392      |
| b <sup>5</sup> +H <sub>2</sub> O | 514.3494   | 514.2982  | 0.0511      | x <sub>5</sub>                   | 554.3548   | 554.3978  | 0.0430      |
| b <sup>5</sup>                   | 496.3494   | 496.3857  | 0.0364      | z <sub>6</sub>                   | 624.4331   | 624.4921  | 0.0590      |
| a <sup>6</sup>                   | 581.4385   | 581.4949  | 0.0564      | y <sub>6</sub>                   | 641.4596   | 641.5109  | 0.0512      |
| b <sup>6</sup>                   | 609.4334   | 609.4700  | 0.0366      | x <sub>6</sub>                   | 667.4389   | 667.4294  | 0.0094      |
| a <sup>7</sup>                   | 652.4756   | 652.5311  | 0.0555      | z <sub>7</sub> +H <sub>2</sub> O | 713.4702   | 713.3705  | 0.0996      |
| b <sup>7</sup> +H <sub>2</sub> O | 698.4705   | 698.5139  | 0.0434      | z <sub>7</sub>                   | 695.4702   | 695.4602  | 0.0100      |
| b <sup>7</sup>                   | 680.4705   | 680.5207  | 0.0502      | y <sub>7</sub>                   | 712.4967   | 712.5256  | 0.0289      |
| a <sup>9</sup>                   | 836.5968   | 836.5648  | 0.0320      | y <sub>8</sub>                   | 825.5808   | 825.5865  | 0.0057      |
| b <sup>9</sup>                   | 864.5917   | 864.5847  | 0.0070      | x <sub>8</sub>                   | 851.5601   | 851.4989  | 0.0612      |

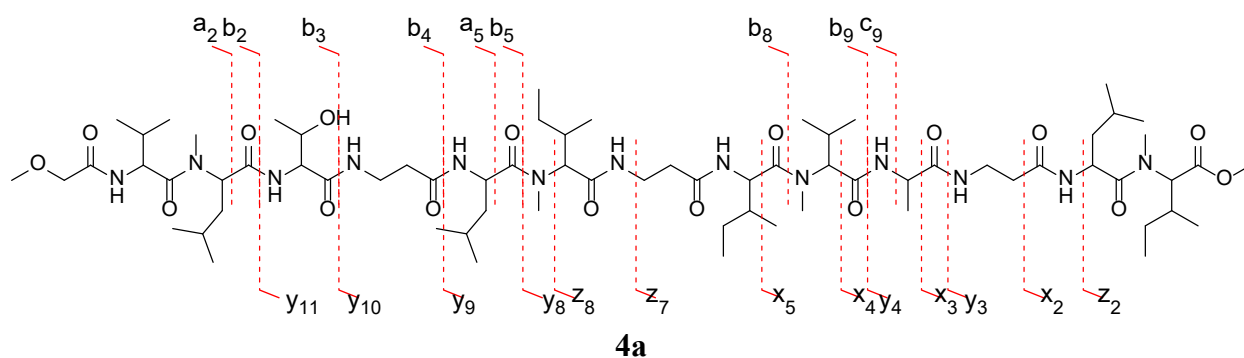

**Table S7** List of obtained fragment ions from MS/MS analysis of **4a**.

| Ion            | Calc. (Da) | Obs. (Da) | Δdelta (Da) | Ion                               | Calc. (Da) | Obs. (Da) | Δdelta (Da) |
|----------------|------------|-----------|-------------|-----------------------------------|------------|-----------|-------------|
| a <sub>2</sub> | 271.2016   | 271.1837  | 0.0180      | z <sub>2</sub>                    | 256.1907   | 256.2704  | 0.0797      |
| b <sub>2</sub> | 299.1965   | 299.1750  | 0.0215      | x <sub>2</sub>                    | 299.1965   | 299.1750  | 0.0215      |
| b <sub>3</sub> | 400.2442   | 400.2280  | 0.0162      | y <sub>3</sub>                    | 344.2544   | 344.2978  | 0.0434      |
| b <sub>4</sub> | 471.2813   | 471.2309  | 0.0505      | x <sub>3</sub>                    | 370.2337   | 370.2358  | 0.0022      |
| a <sub>5</sub> | 556.3705   | 556.3392  | 0.0312      | z <sub>4</sub> +H <sub>2</sub> O  | 416.2650   | 416.3665  | 0.1016      |
| b <sub>5</sub> | 584.3654   | 584.3403  | 0.0251      | y <sub>4</sub>                    | 415.2915   | 415.3169  | 0.0254      |
| b <sub>8</sub> | 895.5863   | 895.8677  | 0.2814      | x <sub>4</sub>                    | 441.2708   | 441.3416  | 0.0709      |
| b <sub>9</sub> | 1008.6704  | 1008.5639 | 0.1064      | y <sub>5</sub> +H <sub>2</sub> O  | 546.3756   | 546.8662  | 0.4907      |
| c <sub>9</sub> | 1025.6969  | 1025.7136 | 0.0167      | x <sub>5</sub>                    | 554.3548   | 554.3998  | 0.0450      |
|                |            |           |             | x <sub>6</sub> +H <sub>2</sub> O  | 685.4389   | 685.5997  | 0.1608      |
|                |            |           |             | z <sub>7</sub>                    | 695.4702   | 695.7993  | 0.3291      |
|                |            |           |             | z <sub>8</sub>                    | 808.5543   | 808.5745  | 0.0203      |
|                |            |           |             | y <sub>8</sub>                    | 839.5965   | 839.5953  | 0.0012      |
|                |            |           |             | x <sub>8</sub> +H <sub>2</sub> O  | 883.5757   | 883.8066  | 0.2309      |
|                |            |           |             | y <sub>9</sub>                    | 952.6805   | 952.6453  | 0.0353      |
|                |            |           |             | z <sub>10</sub> +H <sub>2</sub> O | 1024.6911  | 1024.6700 | 0.0210      |
|                |            |           |             | y <sub>10</sub>                   | 1023.7176  | 1023.6793 | 0.0384      |
|                |            |           |             | z <sub>11</sub> +H <sub>2</sub> O | 1125.7388  | 1125.7618 | 0.0231      |
|                |            |           |             | y <sub>11</sub>                   | 1124.7653  | 1124.8483 | 0.0830      |

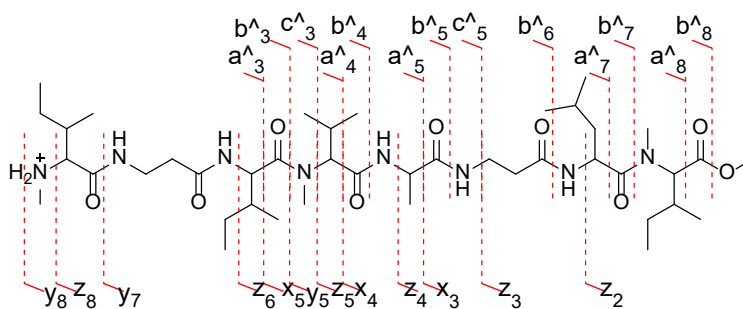

**y<sub>8</sub>-4a**

**Table S8.** List of obtained fragment ions from MS/MS/MS analysis of y<sub>8</sub>-4a.

| Ion            | Calc. (Da) | Obs. (Da) | Δdelta (Da) | Ion                              | Calc. (Da) | Obs. (Da) | Δdelta (Da) |
|----------------|------------|-----------|-------------|----------------------------------|------------|-----------|-------------|
| a <sup>3</sup> | 284.2333   | 284.2332  | 0.0000      | z <sub>2</sub>                   | 256.1907   | 256.1338  | 0.0569      |
| b <sup>3</sup> | 312.2282   | 312.2136  | 0.0146      | z <sub>3</sub>                   | 327.2278   | 327.2726  | 0.0448      |
| c <sup>3</sup> | 343.2704   | 343.1992  | 0.0712      | x <sub>3</sub>                   | 370.2337   | 370.2361  | 0.0025      |
| a <sup>4</sup> | 397.3173   | 397.3780  | 0.0607      | z <sub>4</sub>                   | 398.2650   | 398.2657  | 0.0007      |
| b <sup>4</sup> | 425.3122   | 425.3024  | 0.0098      | x <sub>4</sub>                   | 441.2708   | 441.3000  | 0.0292      |
| a <sup>5</sup> | 468.3544   | 468.3275  | 0.0270      | z <sub>5</sub>                   | 497.3334   | 497.3290  | 0.0044      |
| b <sup>5</sup> | 496.3494   | 496.3673  | 0.0179      | y <sub>5</sub>                   | 528.3756   | 528.3574  | 0.0181      |
| c <sup>5</sup> | 513.3759   | 513.3659  | 0.0100      | x <sub>5</sub>                   | 554.3548   | 554.4479  | 0.0930      |
| b <sup>6</sup> | 567.3865   | 567.3593  | 0.0272      | z <sub>6</sub> +H <sub>2</sub> O | 642.4331   | 642.5131  | 0.0800      |
| a <sup>7</sup> | 652.4756   | 652.4598  | 0.0158      | z <sub>6</sub>                   | 624.4331   | 624.4572  | 0.0241      |
| b <sup>7</sup> | 680.4705   | 680.4728  | 0.0023      | z <sub>7</sub> +H <sub>2</sub> O | 713.4702   | 713.4330  | 0.0372      |
| a <sup>8</sup> | 779.5753   | 779.5262  | 0.0491      | y <sub>7</sub>                   | 712.4967   | 712.4854  | 0.0114      |
| b <sup>8</sup> | 807.5702   | 807.5375  | 0.0328      | z <sub>8</sub>                   | 808.5543   | 808.6328  | 0.0786      |

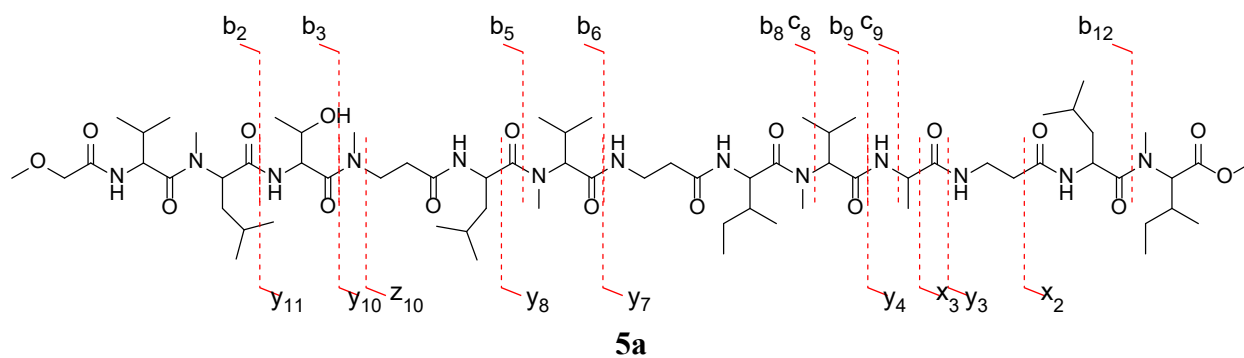

**Table S9.** List of obtained fragment ions from MS/MS analysis of **5a**.

| Ion                              | Calc. (Da) | Obs. (Da) | $\Delta$ (Da) | Ion                               | Calc. (Da) | Obs. (Da) | $\Delta$ (Da) |
|----------------------------------|------------|-----------|---------------|-----------------------------------|------------|-----------|---------------|
| c <sub>1</sub> +H <sub>2</sub> O | 221.1390   | 221.0938  | 0.0453        | y <sub>2</sub> +H <sub>2</sub> O  | 291.2173   | 291.7729  | 0.5557        |
| b <sub>2</sub>                   | 299.1965   | 299.1843  | 0.0123        | x <sub>2</sub>                    | 299.1965   | 299.1843  | 0.0123        |
| c <sub>2</sub> +H <sub>2</sub> O | 334.2231   | 334.4922  | 0.2692        | y <sub>3</sub>                    | 344.2544   | 344.2374  | 0.0170        |
| b <sub>3</sub>                   | 400.2442   | 400.1840  | 0.0602        | x <sub>3</sub>                    | 370.2337   | 370.3042  | 0.0705        |
| b <sub>4</sub> +H <sub>2</sub> O | 503.2970   | 503.3360  | 0.0390        | y <sub>4</sub>                    | 415.2915   | 415.3901  | 0.0986        |
| a <sub>5</sub> +H <sub>2</sub> O | 588.3861   | 588.3979  | 0.0118        | y <sub>7</sub>                    | 712.4967   | 712.4849  | 0.0118        |
| b <sub>5</sub>                   | 598.3810   | 598.3754  | 0.0057        | y <sub>8</sub>                    | 839.5965   | 839.5500  | 0.0465        |
| b <sub>6</sub>                   | 725.4808   | 725.4555  | 0.0252        | z <sub>10</sub>                   | 1006.6911  | 1006.7667 | 0.0756        |
| c <sub>6</sub> +H <sub>2</sub> O | 760.5073   | 760.4808  | 0.0265        | y <sub>10</sub>                   | 1037.7333  | 1037.7349 | 0.0016        |
| b <sub>8</sub>                   | 909.6019   | 909.5986  | 0.0034        | z <sub>11</sub> +H <sub>2</sub> O | 1139.7810  | 1139.8339 | 0.0529        |
| c <sub>8</sub>                   | 940.6441   | 940.6146  | 0.0296        | y <sub>11</sub>                   | 1138.7810  | 1138.7908 | 0.0098        |
| b <sub>9</sub>                   | 1022.6860  | 1022.6556 | 0.0304        |                                   |            |           |               |
| c <sub>9</sub>                   | 1039.7125  | 1039.7324 | 0.0199        |                                   |            |           |               |
| b <sub>12</sub>                  | 1277.8443  | 1277.9799 | 0.1356        |                                   |            |           |               |

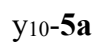

| Ion                              | Calc. (Da) | Obs. (Da) | Δelta (Da) | Ion                              | Calc. (Da) | Obs. (Da) | Δelta (Da) |
|----------------------------------|------------|-----------|------------|----------------------------------|------------|-----------|------------|
| b <sup>3</sup>                   | 299.2562   | 299.1168  | 0.1394     | x <sub>2</sub>                   | 299.1965   | 299.1168  | 0.0797     |
| c <sup>3</sup>                   | 327.2511   | 327.2304  | 0.0207     | z <sub>3</sub>                   | 327.2278   | 327.2304  | 0.0025     |
| a <sup>4</sup>                   | 344.2776   | 344.2719  | 0.0057     | y <sub>3</sub>                   | 344.2544   | 344.2719  | 0.0175     |
| b <sup>4</sup>                   | 369.2860   | 369.2168  | 0.0692     | y <sub>5</sub>                   | 528.3756   | 528.3298  | 0.0457     |
| c <sup>4</sup>                   | 397.2809   | 397.2720  | 0.0089     | x <sub>5</sub>                   | 554.3548   | 554.3840  | 0.0292     |
| b <sup>5</sup>                   | 482.3701   | 482.4616  | 0.0916     | z <sub>6</sub>                   | 624.4331   | 624.4669  | 0.0338     |
| c <sup>5</sup> +H <sub>2</sub> O | 528.3650   | 528.3298  | 0.0352     | z <sub>7</sub> +H <sub>2</sub> O | 713.4702   | 713.5400  | 0.0698     |
| c <sup>5</sup>                   | 510.3650   | 510.3632  | 0.0018     | y <sub>7</sub>                   | 712.4967   | 712.4955  | 0.0012     |
| c <sup>6</sup>                   | 623.4491   | 623.4429  | 0.0062     |                                  |            |           |            |
| c <sup>7</sup> +H <sub>2</sub> O | 712.4862   | 712.4955  | 0.0094     |                                  |            |           |            |
| c <sup>7</sup>                   | 694.4862   | 694.4308  | 0.0554     |                                  |            |           |            |
| c <sup>8</sup>                   | 765.5233   | 765.5231  | 0.0002     |                                  |            |           |            |
| b <sup>9</sup>                   | 850.6124   | 850.6707  | 0.0583     |                                  |            |           |            |
| c <sup>9</sup>                   | 878.6074   | 878.5517  | 0.0557     |                                  |            |           |            |

**Table S11.** Biological activity of the isolated compounds.

| Comp.    | MIC ( $\mu$ M) <sup>a</sup> |                 |                 | IC <sub>50</sub> ( $\mu$ M) in DMEM <sup>a</sup> |               |          | PC <sub>50</sub> ( $\mu$ M) in NDM <sup>a</sup> |               |          |
|----------|-----------------------------|-----------------|-----------------|--------------------------------------------------|---------------|----------|-------------------------------------------------|---------------|----------|
|          | EC <sup>b</sup>             | BC <sup>b</sup> | KR <sup>b</sup> | HepG2                                            | MIA<br>PaCa-2 | MCF<br>7 | HepG2                                           | MIA<br>PaCa-2 | MCF<br>7 |
| <b>1</b> | >66                         | >66             | >66             | >100                                             | >100          | >100     | >100                                            | 42.8          | >100     |
| <b>2</b> | >66                         | >66             | >66             | >100                                             | >100          | >100     | >100                                            | 33.4          | >100     |
| <b>3</b> | >66                         | >66             | >66             | >100                                             | 73.2          | >100     | >100                                            | 10.0          | >100     |
| <b>4</b> | >66                         | >66             | >66             | >100                                             | 38.2          | >100     | >100                                            | 7.8           | >100     |
| <b>5</b> | >66                         | >66             | >66             | >100                                             | 40.4          | >100     | >100                                            | 3.5           | >100     |
| <b>6</b> | >66                         | >66             | >66             | >100                                             | 42.7          | >100     | >100                                            | 8.2           | >100     |

<sup>a</sup>MIC (Minimum Inhibitory Concentration); PC (Preferential Cytotoxic); IC (Inhibitory Concentration).

<sup>b</sup>Tested bacteria (EC : *Escherichia coli* JW5503), and gram-positive (BC : *Bacillus cereus* NBRC 15305), and (BC : *Kocuria rhizophila* NBRC 12708).
